# Supplementary material
Source: PubMed Central journal article supplement (PMC3763855)

**Supporting Information for**  
**Cu/Nitroxyl Catalyzed Aerobic Oxidation of Primary Amines into Nitriles at Room Temperature**

Jinho Kim and Shannon S. Stahl\*

*Department of Chemistry, University of Wisconsin-Madison,  
1101 University Avenue, Madison, Wisconsin, 53706  
stahl@chem.wisc.edu*

|     |                                                                                  |     |
|-----|----------------------------------------------------------------------------------|-----|
| 1.  | General considerations                                                           | S1  |
| 2.  | The synthesis of ABNO (9-azabicyclo[3.3.1]nonane <i>N</i> -oxyl)                 | S2  |
| 3.  | Optimization of Cu/nitroxyl catalyzed oxidation of primary amines to nitriles    | S3  |
| 4.  | CuI/ABNO catalyzed aerobic amine oxidation to nitrile                            | S5  |
| 5.  | Experimental procedure for 10 mmol-scale reaction                                | S9  |
| 6.  | KIE study using gas uptake                                                       | S9  |
| 7.  | Hammett study using gas uptake                                                   | S10 |
| 8.  | O <sub>2</sub> kinetic dependence                                                | S11 |
| 9.  | Investigation of possible intermediates and reaction profile                     | S12 |
| 10. | Cu/nitroxyl-catalyzed oxidation of alcohol to nitriles with NH <sub>3</sub> (aq) | S12 |
| 11. | References                                                                       | S15 |
| 12. | <sup>1</sup> H and <sup>13</sup> C NMR Spectra of Substrates                     | S16 |

### **1. General Considerations.**

All commercially available compounds and solvents were purchased and used as received, unless otherwise noted. <sup>1</sup>H and <sup>13</sup>C NMR spectra were recorded on Bruker Avance III 400 or Bruker Avance III 500 spectrometer. Chemical shift values are given in parts per million relative to internal TMS (0.00 ppm for <sup>1</sup>H) or CDCl<sub>3</sub> (77.16 ppm for <sup>13</sup>C). The following abbreviations were used to describe peak splitting patterns when appropriate: br = broad, s = singlet, d = doublet, t = triplet, q = quartet, p = pentet, m = multiplet, dd = double of doublet, dt = double of triplet, td = triple of doublet. Coupling constants, *J*, were reported in hertz unit (Hz). Analytical thin layer chromatography (TLC) was performed on precoated silica gel 60 F254 plates. Visualization on TLC was achieved by the use of UV light (254 nm) and treatment with phosphomolybdic acid stain followed by heating. Flash chromatography was performed using SiliaFlash® P60 (Silicycle, particle size 40-63 μm, 230-400 mesh). High-resolution mass spectra were obtained by the mass spectrometry facility at the University of Wisconsin.

## 2. The synthesis of ABNO (9-azabicyclo[3.3.1]nonane *N*-oxyl).<sup>1</sup>

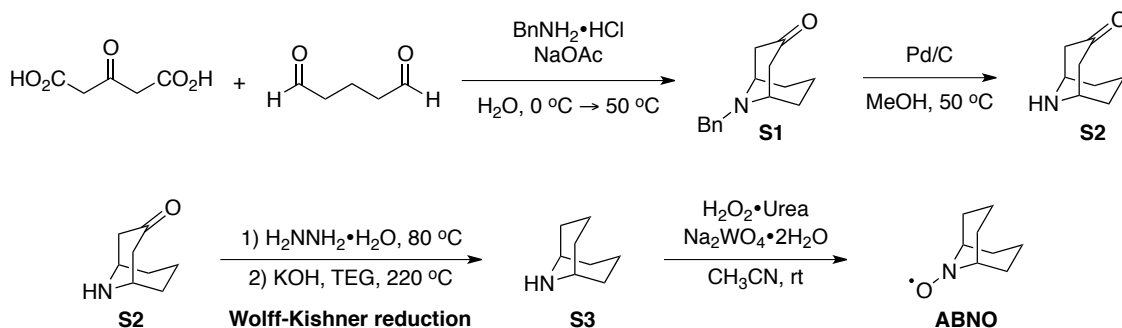

To a mixture of acetonedicarboxylic acid (2.9 g, 20 mmol, 1 equiv) and benzylamine hydrochloride (3.4 g, 24 mmol, 1.2 equiv) with  $\text{H}_2\text{O}$  (10 mL) in a 250 mL flask, was slowly added  $\text{NaOAc}$  aqueous solution (0.8 g, 10 mmol, 0.5 equiv in 7 mL of  $\text{H}_2\text{O}$ ) at  $0\text{ }^\circ\text{C}$ . Then, glutaraldehyde (25% in water, 8 mL, 20 mmol) was added. After the removal of the ice bath, the mixture was stirred for 2 hours at room temperature then stirred for 12 hours at  $50\text{ }^\circ\text{C}$ . The mixture was cooled to room temperature. The mixture was extracted with  $\text{CH}_2\text{Cl}_2$  several times. The combined organic layer was washed with brine and dried over  $\text{MgSO}_4$ , filtered, and concentrated in *vacuo*. The residue was purified by column chromatography using ethyl acetate/hexane (1/3) to give **S1** as a brown solid in 84% yield (3.84 g, 16.8 mmol).

A 250 mL flask which was equipped with a magnetic stir bar and charged with **S1** (3.84 g, 16.8 mmol) and  $\text{Pd/C}$  (5 %  $\text{Pd}$ , 5 mol %, 2 g) was evacuated and backfilled with hydrogen. 100 mL of  $\text{MeOH}$  was added. The reaction mixture was stirred at  $50\text{ }^\circ\text{C}$  for 24 hours under a hydrogen balloon, and then cooled to room temperature. The black suspension was filtered over Celite and washed with  $\text{MeOH}$  thoroughly. All volatiles were removed under reduced pressure to afford pure deprotected amine **S2** in 89% yield.

The mixture of **S2** (2.1 g, 15 mmol) and  $\text{H}_2\text{NNH}_2 \cdot \text{H}_2\text{O}$  (2.5 mL, 45.1 mmol, 3 equiv) was stirred at  $80\text{ }^\circ\text{C}$  for 2 h. To a solution of  $\text{KOH}$  (8.4 g, 150 mmol, 10 equiv) in triethylene glycol (21 mL) in three-neck round bottom flask setting up distillation apparatus, the solution of **S2** and  $\text{H}_2\text{NNH}_2 \cdot \text{H}_2\text{O}$  was added dropwise. After the mixture was stirred at  $220\text{ }^\circ\text{C}$  for 30 min,  $\text{H}_2\text{O}$  (50 mL) was added dropwise over 2 h at  $220\text{ }^\circ\text{C}$ . During the reaction, the product, amine **S3**, was distilled with  $\text{H}_2\text{O}$  under azeotropic condition. The resulting aqueous solution was extracted with  $\text{CH}_2\text{Cl}_2$  and dried over  $\text{MgSO}_4$ . Evaporation of the solvent afforded **S3** (1.48 g) as a colorless oil, which was used in the next reaction without further purification.

To a solution of the crude **S3** (1.48 g) in  $\text{MeCN}$  (10 mL) was added  $\text{Na}_2\text{WO}_4 \cdot \text{H}_2\text{O}$  (0.39 g, 1.18 mmol, 0.1 equiv) at ambient temperature and the mixture was stirred for 30 min. After cooling to  $0\text{ }^\circ\text{C}$ , urea hydrogen peroxide (3.3 g, 35.4 mmol, 3 equiv) was added and the reaction mixture was stirred at  $0\text{ }^\circ\text{C}$  for 1 h and at ambient temperature for 4 h.  $\text{H}_2\text{O}$  was added to the reaction mixture and the aqueous solution was extracted with  $\text{CH}_2\text{Cl}_2$ . The organic layer was dried over  $\text{MgSO}_4$  and concentrated. The residue was purified by silica gel column chromatography using ethyl acetate/hexane (1/1) to yield **ABNO** (1.15 g, 8.2 mmol) as a red solid.

### 3. Optimization of Cu/nitroxyl catalyzed oxidation of primary amines to nitriles.

**Optimization for benzylamines (Table 1)** A 16 mm culture tube, which was equipped with a magnetic stir bar and charged with Cu (0.025 mmol), nitroxyl (0.025 mmol), ligand (0.025 mmol) and base (0.05 mmol) was evacuated and backfilled with oxygen (this process was repeated a total of 3 times). 4-methoxybenzylamine (0.5 mmol) was added with CH<sub>3</sub>CN (2.0 mL). The solution was stirred for 15 h at room temperature under O<sub>2</sub> balloon, then the reaction was diluted by adding EtOAc and aqueous NH<sub>4</sub>Cl solution. Two layers were separated, and the aqueous layer was extracted with EtOAc. The combined organic layers were dried over MgSO<sub>4</sub>, filtered, and concentrated in *vacuo*. The <sup>1</sup>H NMR yield of desired product was determined by integration using an internal standard (1,1,2,2-tetrachloroethane).

**Table S1.** Solvent effect on Cu/ABNO-catalyzed amine oxidation.

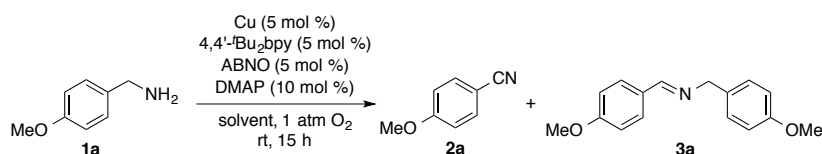

| entry | solvent            | yield (%) |    |
|-------|--------------------|-----------|----|
|       |                    | 2a        | 3a |
| 1     | CH <sub>3</sub> CN | 90        | 5  |
| 2     | THF                | 48        | 46 |
| 3     | EtOH               | 2         | 12 |
| 4     | dioxane            | 62        | 30 |
| 5     | DMF                | 51        | 44 |
| 6     | toluene            | 13        | 54 |

**Table S2.** Optimization of Cu/nitroxyl catalyzed aliphatic amines oxidation.

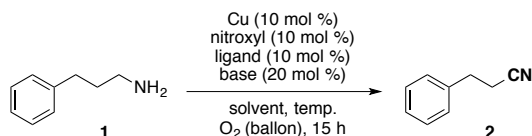

| entry | Cu source                               | nitroxyl | ligand | base | solvent            | temp. (°C) | yield (%) |
|-------|-----------------------------------------|----------|--------|------|--------------------|------------|-----------|
| 1     | CuCl                                    | TEMPO    | bpy    | -    | CH <sub>3</sub> CN | 60         | 18        |
| 2     | CuBr                                    | TEMPO    | bpy    | -    | CH <sub>3</sub> CN | 60         | 25        |
| 3     | CuI                                     | TEMPO    | bpy    | -    | CH <sub>3</sub> CN | 60         | 41        |
| 4     | Cu(CH <sub>3</sub> CN) <sub>4</sub> OTf | TEMPO    | bpy    | -    | CH <sub>3</sub> CN | 60         | 13        |
| 5     | CuCl <sub>2</sub>                       | TEMPO    | bpy    | -    | CH <sub>3</sub> CN | 60         | 0         |
| 6     | CuBr <sub>2</sub>                       | TEMPO    | bpy    | -    | CH <sub>3</sub> CN | 60         | 0         |
| 7     | Cu(OAc) <sub>2</sub>                    | TEMPO    | bpy    | -    | CH <sub>3</sub> CN | 60         | 0         |
| 8     | Cu(OTf) <sub>2</sub>                    | TEMPO    | bpy    | -    | CH <sub>3</sub> CN | 60         | 0         |
| 9     | CuI                                     | -        | bpy    | -    | CH <sub>3</sub> CN | 60         | 28        |

|    |     |                                                                                                          |                                                                                                                  |                                                                                             |                    |    |    |
|----|-----|----------------------------------------------------------------------------------------------------------|------------------------------------------------------------------------------------------------------------------|---------------------------------------------------------------------------------------------|--------------------|----|----|
| 10 | CuI | <br>ABNO                | bpy                                                                                                              | -                                                                                           | CH <sub>3</sub> CN | 60 | 62 |
| 11 | CuI | <br>ketoABNO            | bpy                                                                                                              | -                                                                                           | CH <sub>3</sub> CN | 60 | 52 |
| 12 | CuI | AZADO                                                                                                    | bpy                                                                                                              | -                                                                                           | CH <sub>3</sub> CN | 60 | 53 |
| 13 | CuI | <br>OMe<br>Me Me Me Me  | bpy                                                                                                              | -                                                                                           | CH <sub>3</sub> CN | 60 | 43 |
| 14 | CuI | <br>O<br>Me Me Me Me    | bpy                                                                                                              | -                                                                                           | CH <sub>3</sub> CN | 60 | 20 |
| 15 | CuI | <br>OH<br>Me Me Me Me   | bpy                                                                                                              | -                                                                                           | CH <sub>3</sub> CN | 60 | 34 |
| 16 | CuI | <br>NHAc<br>Me Me Me Me | bpy                                                                                                              | -                                                                                           | CH <sub>3</sub> CN | 60 | 41 |
| 17 | CuI | ABNO                                                                                                     | -                                                                                                                | -                                                                                           | CH <sub>3</sub> CN | 60 | 31 |
| 18 | CuI | ABNO                                                                                                     |                                | -                                                                                           | CH <sub>3</sub> CN | 60 | 34 |
| 19 | CuI | ABNO                                                                                                     | <br>4,4'-OMe <sub>2</sub> bpy | -                                                                                           | CH <sub>3</sub> CN | 60 | 51 |
| 20 | CuI | ABNO                                                                                                     | <br>4,4'-tBu <sub>2</sub> bpy | -                                                                                           | CH <sub>3</sub> CN | 60 | 79 |
| 21 | CuI | ABNO                                                                                                     | <br>4,4'-Me <sub>2</sub> bpy  | -                                                                                           | CH <sub>3</sub> CN | 60 | 67 |
| 22 | CuI | ABNO                                                                                                     | 4,4'-di <sup>t</sup> Bubpy                                                                                       | -                                                                                           | THF                | 60 | 29 |
| 23 | CuI | ABNO                                                                                                     | 4,4'-di <sup>t</sup> Bubpy                                                                                       | -                                                                                           | DMF                | 60 | 60 |
| 24 | CuI | ABNO                                                                                                     | 4,4'-di <sup>t</sup> Bubpy                                                                                       | -                                                                                           | toluene            | 60 | 47 |
| 25 | CuI | ABNO                                                                                                     | 4,4'-di <sup>t</sup> Bubpy                                                                                       | <br>NMI  | CH <sub>3</sub> CN | 60 | 76 |
| 26 | CuI | ABNO                                                                                                     | 4,4'-di <sup>t</sup> Bubpy                                                                                       |          | CH <sub>3</sub> CN | 60 | 75 |
| 27 | CuI | ABNO                                                                                                     | 4,4'-di <sup>t</sup> Bubpy                                                                                       | <br>DMAP | CH <sub>3</sub> CN | 60 | 85 |

|                       |                                         |             |                                           |             |                         |           |           |
|-----------------------|-----------------------------------------|-------------|-------------------------------------------|-------------|-------------------------|-----------|-----------|
| 28                    | CuI                                     | ABNO        | 4,4'-di <sup>t</sup> Bubpy                |             | CH <sub>3</sub> CN      | 60        | 57        |
| <b>39</b>             | <b>CuI</b>                              | <b>ABNO</b> | <b>4,4'-<sup>t</sup>Bu<sub>2</sub>bpy</b> | <b>DMAP</b> | <b>CH<sub>3</sub>CN</b> | <b>rt</b> | <b>90</b> |
| 30 <sup>a</sup>       | Cu(CH <sub>3</sub> CN) <sub>4</sub> OTf | TEMPO       | bpy                                       | NMI         | CH <sub>3</sub> CN      | rt        | 5         |
| 31 <sup>a</sup>       | CuI                                     | TEMPO       | bpy                                       | NMI         | CH <sub>3</sub> CN      | rt        | 8         |
| 32 <sup>a</sup>       | CuI                                     | ABNO        | bpy                                       | NMI         | CH <sub>3</sub> CN      | rt        | 55        |
| 33 <sup>a</sup>       | CuI                                     | ketoABNO    | bpy                                       | NMI         | CH <sub>3</sub> CN      | rt        | 18        |
| 34 <sup>a</sup>       | CuI                                     | AZADO       | bpy                                       | NMI         | CH <sub>3</sub> CN      | rt        | 47        |
| 35 <sup>a</sup>       | CuI                                     | ABNO        | 4,4'-OMe <sub>2</sub> bpy                 | NMI         | CH <sub>3</sub> CN      | rt        | 31        |
| 36 <sup>a</sup>       | CuI                                     | ABNO        | 4,4'-Me <sub>2</sub> bpy                  | NMI         | CH <sub>3</sub> CN      | rt        | 63        |
| 37 <sup>a</sup>       | CuI                                     | ABNO        | 4,4'- <sup>t</sup> Bu <sub>2</sub> bpy    | NMI         | CH <sub>3</sub> CN      | rt        | 65        |
| <b>38<sup>a</sup></b> | <b>CuI</b>                              | <b>ABNO</b> | <b>4,4'-<sup>t</sup>Bu<sub>2</sub>bpy</b> | <b>DMAP</b> | <b>CH<sub>3</sub>CN</b> | <b>rt</b> | <b>73</b> |
| 40 <sup>a</sup>       | CuI                                     | ABNO        | 4,4'- <sup>t</sup> Bu <sub>2</sub> bpy    | -           | CH <sub>3</sub> CN      | rt        | 66        |
| 41 <sup>a,b</sup>     | CuI                                     | ABNO        | 4,4'- <sup>t</sup> Bu <sub>2</sub> bpy    | DMAP        | CH <sub>3</sub> CN      | rt        | 60        |

<sup>a</sup> 5 mol % of Cu, nitroxyl, ligand, and 10 mol % of base were employed. <sup>b</sup> Carried out under air.

#### 4. CuI/ABNO catalyzed aerobic amine oxidation to nitrile

All amines were purchased and used as received. 4-Nitrobenzylamine **1f** was prepared by neutralization of the commercially available 4-nitrobenzylamine hydrochloride salt. Allylic amine **1p** was prepared by neutralization of its hydrochloride salt, which was synthesized by a literature procedure.<sup>2</sup>

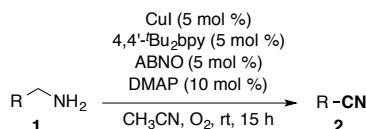

A 16 mm culture tube, which was equipped with a magnetic stir bar and charged with CuI (0.025 mmol), ABNO (0.025 mmol), 4,4'-<sup>t</sup>Bu<sub>2</sub>bpy (0.025 mmol) and DMAP (0.05 mmol) was evacuated and backfilled with oxygen (this process was repeated a total of 3 times). Amines (0.5 mmol) were added with CH<sub>3</sub>CN (2.0 mL). The solution was stirred for 15 h at room temperature under O<sub>2</sub> balloon, and then the reaction was diluted by adding EtOAc and aqueous NH<sub>4</sub>Cl solution. Two layers were separated, and the aqueous layer was extracted with EtOAc. The combined organic layers were dried over MgSO<sub>4</sub>, filtered, and concentrated *in vacuo*. The residue was purified by column chromatography to give a nitrile product. Spectral properties of all products are consistent with literature values.

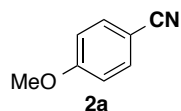

**4-Methoxybenzonitrile**<sup>3</sup> (**2a**, 89%); <sup>1</sup>H NMR (400 MHz, CDCl<sub>3</sub>) δ 7.59 (d, *J* = 8.8 Hz, 2H), 6.95 (d, *J* = 8.8 Hz, 2H), 3.86 (s, 3H); <sup>13</sup>C NMR (101 MHz, CDCl<sub>3</sub>) δ 162.84, 133.97, 119.24, 114.75, 103.94, 55.55.

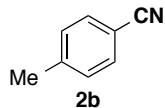

**4-Methylbenzonitrile**<sup>3</sup> (**2b**, 91%); <sup>1</sup>H NMR (400 MHz, CDCl<sub>3</sub>) δ 7.54 (d, *J* = 7.9 Hz, 2H), 7.27 (d, *J* = 7.8 Hz, 2H), 2.42 (s, 3H); <sup>13</sup>C NMR (101 MHz, CDCl<sub>3</sub>) δ 143.69, 132.04, 129.83, 119.16, 109.31, 21.84.

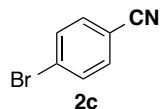

**4-Bromobenzonitrile**<sup>3</sup> (**2c**, 95%); <sup>1</sup>H NMR (400 MHz, CDCl<sub>3</sub>) δ 7.64 (d, *J* = 8.5 Hz, 2H), 7.53 (d, *J* = 8.5 Hz, 2H); <sup>13</sup>C NMR (101 MHz, CDCl<sub>3</sub>) δ 133.39, 132.62, 127.99, 118.04, 111.23.

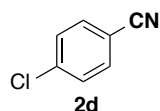

**4-Chlorobenzonitrile**<sup>3</sup> (**2d**, 85%); <sup>1</sup>H NMR (400 MHz, CDCl<sub>3</sub>) δ 7.61 (d, *J* = 8.2 Hz, 2H), 7.47 (d, *J* = 8.2 Hz, 2H); <sup>13</sup>C NMR (101 MHz, CDCl<sub>3</sub>) δ 139.55, 133.38, 129.70, 117.97, 110.79.

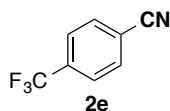

**4-Trifluorobenzonitrile**<sup>3</sup> (**2e**, 92%); <sup>1</sup>H NMR (400 MHz, CDCl<sub>3</sub>) δ 7.82 (d, *J* = 8.3 Hz, 2H), 7.77 (d, *J* = 8.3 Hz, 2H); <sup>13</sup>C NMR (126 MHz, CDCl<sub>3</sub>) δ 134.59 (q, *J*<sub>2</sub> = 33.4 Hz), 132.74, 126.23 (q, *J*<sub>3</sub> = 3.7 Hz), 123.09 (q, *J*<sub>1</sub> = 273.1 Hz), 117.49, 116.11.

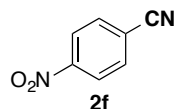

**4-Nitrobenzonitrile**<sup>4</sup> (**2f**, 95%); <sup>1</sup>H NMR (500 MHz, CDCl<sub>3</sub>) δ 8.38 (d, *J* = 8.8 Hz, 2H), 7.91 (d, *J* = 8.8 Hz, 2H); <sup>13</sup>C NMR (126 MHz, CDCl<sub>3</sub>) δ 150.03, 133.51, 124.30, 118.32, 116.84.

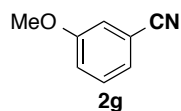

**3-Methoxybenzonitrile**<sup>5</sup> (**2g**, 84%); <sup>1</sup>H NMR (400 MHz, CDCl<sub>3</sub>) δ 7.41-7.34 (m, 1H), 7.28-7.23 (m, 1H), 7.16-7.10 (m, 2H), 3.84 (s, 3H); <sup>13</sup>C NMR (101 MHz, CDCl<sub>3</sub>) δ 159.63, 130.32, 124.50, 119.33, 118.75, 116.82, 113.21, 55.53.

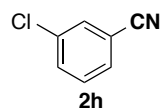

**3-Chlorobenzonitrile**<sup>3</sup> (**2h**, 95%); <sup>1</sup>H NMR (400 MHz, CDCl<sub>3</sub>) δ 7.64 (t, *J* = 1.8 Hz, 1H), 7.62-7.54 (m, 2H), 7.44 (t, *J* = 7.9 Hz, 1H); <sup>13</sup>C NMR (101 MHz, CDCl<sub>3</sub>) δ 135.25, 133.24, 131.92, 130.50, 130.30, 117.44, 113.97.

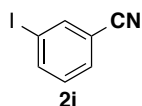

**3-Iodobenzonitrile**<sup>6</sup> (**2i**, 89%); <sup>1</sup>H NMR (400 MHz, CDCl<sub>3</sub>) δ 7.99 (t, *J* = 1.7 Hz, 1H), 7.95 (dt, *J* = 8.1, 1.4 Hz, 1H), 7.64 (dt, *J* = 7.9, 1.3 Hz, 1H), 7.22 (t, *J* = 7.9 Hz, 1H); <sup>13</sup>C NMR (101 MHz, CDCl<sub>3</sub>) δ 141.89, 140.41, 131.18, 130.53, 117.09, 114.21, 93.86.

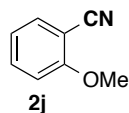

**2-Methoxybenzonitrile**<sup>3</sup> (**2j**, 80%); <sup>1</sup>H NMR (400 MHz, CDCl<sub>3</sub>) δ 7.56-7.53 (m, 2H), 7.07-6.91 (m, 2H), 3.93 (s, 3H); <sup>13</sup>C NMR (101 MHz, CDCl<sub>3</sub>) δ 161.22, 134.42, 133.73, 120.76, 116.52, 111.30, 101.75, 56.00.

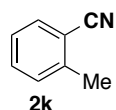

**2-Methylbenzonitrile**<sup>3</sup> (**2k**, 85%); <sup>1</sup>H NMR (400 MHz, CDCl<sub>3</sub>) δ 7.62-7.57 (m, 1H), 7.48 (td, *J* = 7.7, 1.4 Hz, 1H), 7.35-7.23 (m, 2H), 2.55 (s, 3H); <sup>13</sup>C NMR (101 MHz, CDCl<sub>3</sub>) δ 141.93, 132.63, 132.50, 130.22, 126.21, 118.14, 112.77, 20.47.

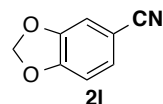

**Piperonylnitrile**<sup>7</sup> (**2l**, 97%); <sup>1</sup>H NMR (500 MHz, CDCl<sub>3</sub>) δ 7.21 (dd, *J* = 8.1, 1.6 Hz, 1H), 7.03 (d, *J* = 1.6 Hz, 1H), 6.87 (d, *J* = 8.0 Hz, 1H), 6.07 (s, 2H); <sup>13</sup>C NMR (126 MHz, CDCl<sub>3</sub>) δ 151.54, 148.03, 128.22, 118.90, 111.40, 109.14, 104.94, 102.23.

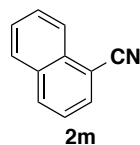

**1-Naphthonitrile**<sup>3</sup> (**2m**, 98%); <sup>1</sup>H NMR (500 MHz, CDCl<sub>3</sub>) δ 8.23 (dd, *J* = 8.4, 1.0 Hz, 1H), 8.09–8.05 (m, 1H), 7.94–7.87 (m, 2H), 7.68 (ddd, *J* = 8.4, 6.9, 1.3 Hz, 1H), 7.61 (ddd, *J* = 8.2, 6.9, 1.2 Hz, 1H), 7.51 (dd, *J* = 8.3, 7.1 Hz, 1H); <sup>13</sup>C NMR (126 MHz, CDCl<sub>3</sub>) δ 133.27, 132.89, 132.61, 132.32, 128.64, 128.58, 127.53, 125.12, 124.91, 117.81, 110.15.

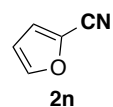

**2-Furonitrile**<sup>8</sup> (**2n**, 82%); <sup>1</sup>H NMR (400 MHz, CDCl<sub>3</sub>) δ 7.60 (d, *J* = 1.7 Hz, 1H), 7.11 (d, *J* = 3.6 Hz, 1H), 6.54 (dd, *J* = 3.6, 1.8 Hz, 1H); <sup>13</sup>C NMR (101 MHz, CDCl<sub>3</sub>) δ 147.33, 126.34, 121.99, 111.45.

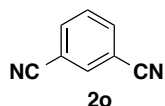

**1,3-Dicyanobenzene**<sup>11</sup> (**2o**, 90%); <sup>1</sup>H NMR (400 MHz, CDCl<sub>3</sub>) δ 7.97 (t, *J* = 1.6 Hz, 1H), 7.91 (dd, *J* = 8.0, 1.6 Hz, 2H), 7.66 (t, *J* = 7.9 Hz, 1H); <sup>13</sup>C NMR (101 MHz, CDCl<sub>3</sub>) δ 136.01, 135.43, 130.36, 116.60, 114.21.

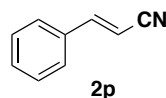

**Cinnamionitrile**<sup>3</sup> (**2p**, 70%); <sup>1</sup>H NMR (400 MHz, CDCl<sub>3</sub>) δ 7.67-7.19 (m, 6H), 5.88 (d, *J* = 16.7 Hz, 1H); <sup>13</sup>C NMR (101 MHz, CDCl<sub>3</sub>) δ 150.61, 133.54, 131.25, 129.15, 127.39, 118.19, 96.37.

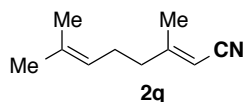

**3,7-Dimethyl-2,6-octadienenitrile** (**2q**, 95%, E:Z=10:1); <sup>1</sup>H NMR (400 MHz, CDCl<sub>3</sub>, major product) δ 5.11 (s, 1H), 5.02 (s, 1H), 2.21-2.17 (m, 4H), 2.05 (s, 3H), 1.69 (s, 3H), 1.61 (s, 3H); <sup>13</sup>C NMR (101 MHz, CDCl<sub>3</sub>, major product) δ 165.02, 133.22, 122.18, 117.29, 95.24, 38.58, 25.66, 25.62, 21.05, 17.74; HRMS (EI) *m/z* calcd for C<sub>10</sub>H<sub>15</sub>N [M]<sup>+</sup>: 149.1204, found 149.1199

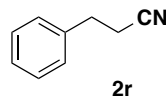

**3-Phenylpropionitrile**<sup>10</sup> (**2r**, 91%); <sup>1</sup>H NMR (400 MHz, CDCl<sub>3</sub>) δ 7.56-7.06 (m, 5H), 2.95 (t, *J* = 7.4 Hz, 2H), 2.61 (t, *J* = 7.4 Hz, 2H); <sup>13</sup>C NMR (101 MHz, CDCl<sub>3</sub>) δ 138.04, 128.87, 128.25, 127.23, 119.12, 31.57, 19.36.

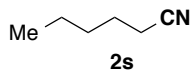

**Hexanenitrile**<sup>11</sup> (**2s**, 90%); yield was determined by <sup>1</sup>H NMR (400 MHz, CDCl<sub>3</sub>) spectroscopy from the crude mixture.

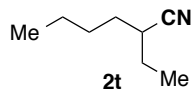

**2-Ethylhexanenitrile**<sup>12</sup> (**2t**, 72%); yield was determined by <sup>1</sup>H NMR (400 MHz, CDCl<sub>3</sub>) spectroscopy from the crude mixture.

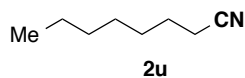

**Octanenitrile**<sup>13</sup> (**2u**, 85%); <sup>1</sup>H NMR (400 MHz, CDCl<sub>3</sub>) δ 2.34 (t, *J* = 7.1 Hz, 2H), 1.66 (p, *J* = 7.2 Hz, 2H), 1.50-1.39 (m, 2H), 1.37-1.24 (m, 6H), 0.89 (t, *J* = 6.7 Hz, 3H); <sup>13</sup>C NMR (101 MHz, CDCl<sub>3</sub>) δ 119.88, 31.49, 28.63, 28.44, 25.39, 22.53, 17.14, 14.02.

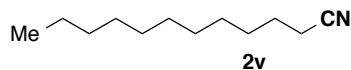



**Dodecanenitrile**<sup>3</sup> (**2v**, 92%); <sup>1</sup>H NMR (400 MHz, CDCl<sub>3</sub>) δ 2.33 (t, *J* = 7.1 Hz, 2H), 1.73-1.60 (m, 2H), 1.44 (t, *J* = 7.5 Hz, 2H), 1.28 (m, 14H), 0.88 (t, *J* = 6.8 Hz, 3H); <sup>13</sup>C NMR (101 MHz, CDCl<sub>3</sub>) δ 119.89, 31.91, 29.57, 29.52, 29.32, 29.31, 28.79, 28.69, 25.40, 22.70, 17.15, 14.13.

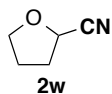

**Tetrahydrofuran-2-carbonitrile**<sup>12</sup> (**2w**, 47%); yield was determined by <sup>1</sup>H NMR (400 MHz, CDCl<sub>3</sub>) spectroscopy from the crude mixture.

## 5. Experimental procedure for 10 mmol-scale reaction

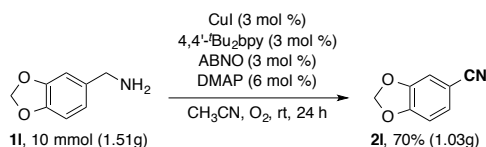

A 250 mL round-bottom flask, which was equipped with a magnetic stir bar and charged with CuI (0.3 mmol), ABNO (0.3 mmol), 4,4'-tBu<sub>2</sub>bpy (0.3 mmol) and DMAP (0.6 mmol) was evacuated and backfilled with oxygen (this process was repeated 3 times). Amine **1i** (10 mmol) was added with CH<sub>3</sub>CN (40 mL). The solution was stirred for 15 h at room temperature under O<sub>2</sub> balloon, then the reaction was diluted by adding EtOAc and aqueous NH<sub>4</sub>Cl solution. The two layers were separated, and the aqueous layer was extracted with EtOAc. The combined organic layers were dried over MgSO<sub>4</sub>, filtered, and concentrated *in vacuo*. The residue was purified by recrystallization with ethyl acetate and hexane to give a nitrile product.

## 6. KIE study using gas uptake

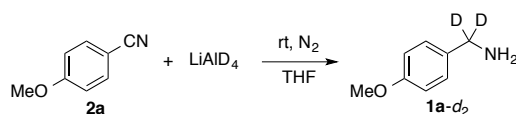

**Synthesis of deuterated benzylamine 1a-d<sub>2</sub>**: 4-MeOC<sub>6</sub>H<sub>4</sub>CD<sub>2</sub>NH<sub>2</sub> was synthesized by reduction of 4-methoxybenzonitrile (538 mg, 4 mmol) dissolved in ice cooled THF (2.5 mL) with lithium aluminum deuteride (185 mg, 4.4 mmol) at room temperature under nitrogen. After 12 h, CH<sub>2</sub>Cl<sub>2</sub> (5 mL) and 1 M NaOH aqueous solution were added in ice cooled bath. The two layers were separated, and the aqueous layer was extracted with CH<sub>2</sub>Cl<sub>2</sub>. The combined organic layers were dried over MgSO<sub>4</sub>, filtered, and concentrated *in vacuo* to produce **1a-d<sub>2</sub>** in 33% yield. The isotopic purity determined by <sup>1</sup>H NMR was 99%.

**Gas uptake kinetic measurements method for KIE study**: Each set of data was collected using a 6-well gas uptake apparatus which holds individually calibrated 25 mL round bottom flasks, each connected to a pressure transducer designed to measure the gas pressure within each sealed reaction vessel. Five vessels contained various reaction mixtures, and the sixth well used as a solvent control for variations in pressure. The apparatus was evacuated and filled with O<sub>2</sub> to 800 torr three times. The pressure was established at 500 torr and the flasks heated to 27 °C. A solution of **1a** (0.5 mmol) in CH<sub>3</sub>CN (1.5 mL) and **1a-d<sub>2</sub>** (0.5 mmol) in CH<sub>3</sub>CN (1.5 mL) was added to separate wells via syringe through a septum, and the pressure and temperature were

allowed to equilibrate. When the pressure (approximately 600 torr) and temperature (27 °C) stabilized, a solution of catalyst (0.05 mmol of CuI, <sup>t</sup>Bu<sub>2</sub>bpy, ABNO, and 0.1 mmol of DMAP) in CH<sub>3</sub>CN (0.5 mL) was added to each well via syringe through a septum. Data were acquired using custom software written within LabVIEW (National Instruments).

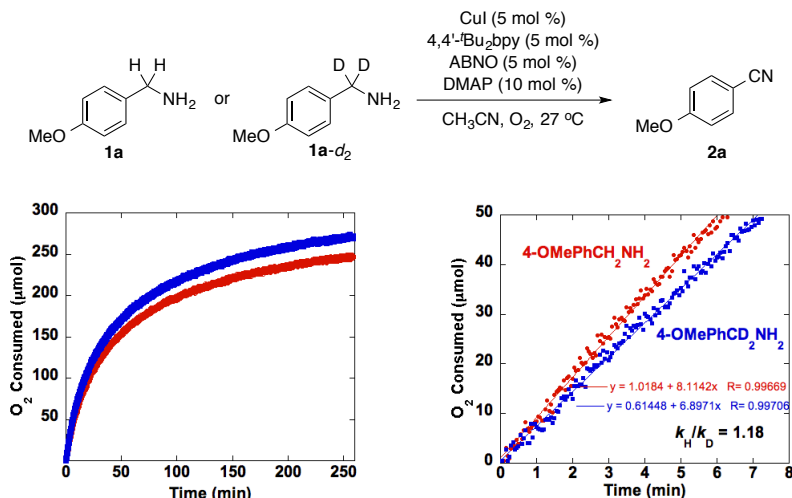

**Figure S1.** Representative data from a KIE study using gas uptake methods.

## 7. Hammett study using gas uptake

**Gas uptake kinetic measurements method for Hammett study:** Each set of data was collected using a 6-well gas uptake apparatus which holds individually calibrated 25 mL round bottom flasks, each connected to a pressure transducer designed to measure the gas pressure within each sealed reaction vessel. Five vessels contained various reaction mixtures, and the sixth well used as a solvent control for variations in pressure. The apparatus was evacuated and filled with O<sub>2</sub> to 800 torr three times. The pressure was established at 500 torr and the flasks heated to 27 °C. A solution of **1a** (0.5 mmol) in CH<sub>3</sub>CN (1.5 mL), **1b** (0.5 mmol) in CH<sub>3</sub>CN (1.5 mL), benzylamine (0.5 mmol) in CH<sub>3</sub>CN, **1d** (0.5 mmol) in CH<sub>3</sub>CN (1.5 mL), and **1e** (0.5 mmol) in CH<sub>3</sub>CN (1.5 mL) was added to separate well via syringe through a septum, and the pressure and temperature allowed to equilibrate. When the pressure (approximately 600 torr) and temperature (27 °C) stabilized, a solution of catalyst (0.05 mmol of CuI, <sup>t</sup>Bu<sub>2</sub>bpy, ABNO, and 0.1 mmol of DMAP) in CH<sub>3</sub>CN (0.5 mL) was added to each well via syringe through a septum. Data were acquired using custom software written within LabVIEW (National Instruments).

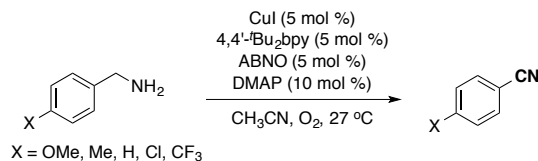

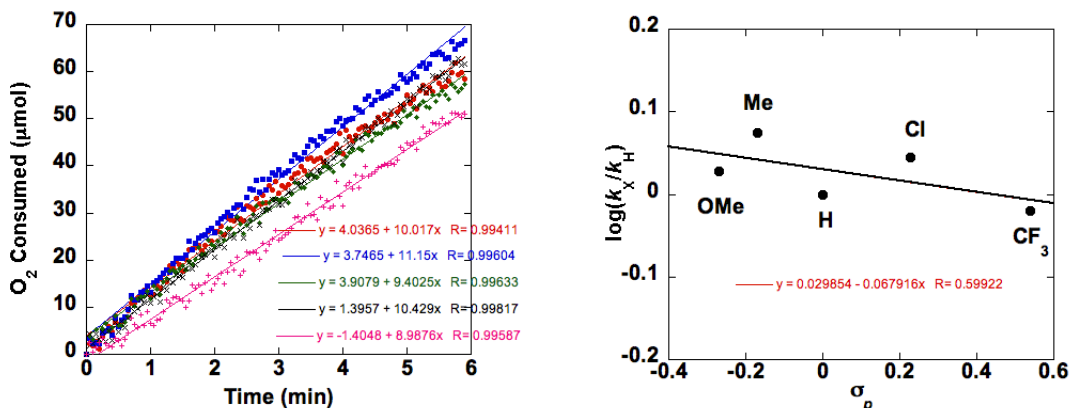

Figure S2. Hammett study with various *para*-substituted benzylamines using gas-uptake methods.

## 8. O<sub>2</sub> kinetic dependence

Each set of data was collected using a 6-well gas uptake apparatus which holds individually calibrated 25 mL round bottom flasks, each connected to a pressure transducer designed to measure the gas pressure within each sealed reaction vessel. Five vessels contained various reaction mixtures, and the sixth well used as a solvent control for variations in pressure. The apparatus was evacuated and filled with O<sub>2</sub> to 800 torr three times. The pressure was established at about 300, 330, 370, and 400 torr for each well and the flasks heated to 27 °C. A solution of **1a** (0.5 mmol) in CH<sub>3</sub>CN (1.5 mL) was added to separate well via syringe through a septum, and the pressure and temperature allowed to equilibrate. When the pressure (373.8, 406.7, 454.23, and 503.8) and temperature (27 °C) stabilized, a solution of catalyst (0.05 mmol of CuI, <sup>t</sup>Bu<sub>2</sub>bpy, ABNO, and 0.1 mmol of DMAP) in CH<sub>3</sub>CN (0.5 mL) was added to each well via syringe through a septum. Data were acquired using custom software written within LabVIEW (National Instruments).

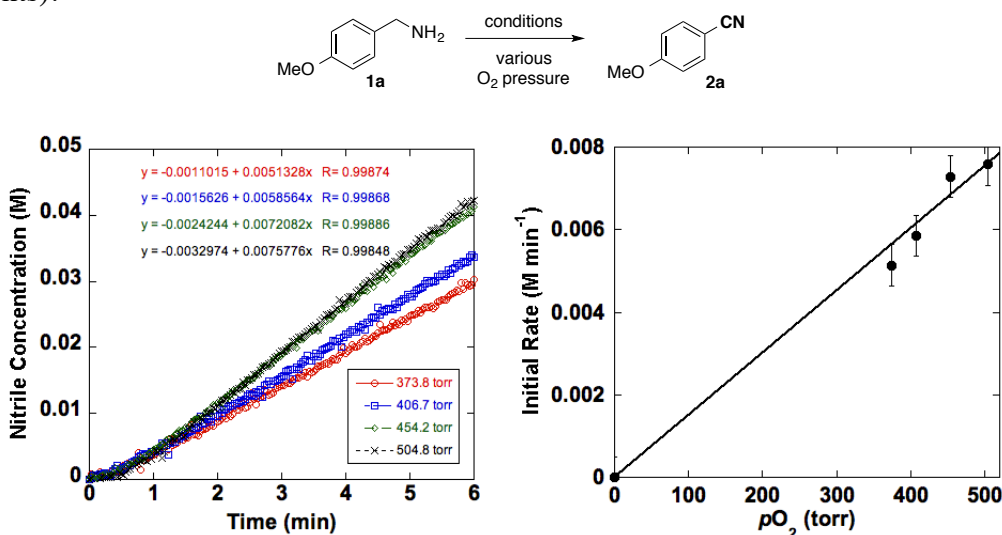

Figure S3. O<sub>2</sub> dependence rate measurements using gas uptake methods.

## 9. Investigation of possible intermediates and reaction profile

### Investigation of possible intermediates

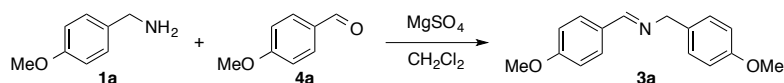

Homocoupled imine **3a** was synthesized by a literature procedure.<sup>14</sup>

A 16 mm culture tube, which was equipped with a magnetic stir bar and charged with CuI (0.025 mmol), ABNO (0.025 mmol), 4,4'-*t*Bu<sub>2</sub>bpy (0.025 mmol) and DMAP (0.05 mmol) was evacuated and backfilled with oxygen (this process was repeated a total of 3 times). Homocoupled imine **3a** (0.25 mmol) in CH<sub>3</sub>CN (2.0 mL) was added with the indicated amount of aqueous ammonia. The solution was stirred for 15 h at room temperature under an O<sub>2</sub> balloon, then the reaction was diluted by adding EtOAc and aqueous NH<sub>4</sub>Cl solution. Two layers were separated, and the aqueous layer was extracted with EtOAc. The combined organic layers were dried over MgSO<sub>4</sub>, filtered, and concentrated *in vacuo*. The <sup>1</sup>H NMR yield of desired product was determined by integration using an internal standard (1,1,2,2-tetrachloroethane).

### Reaction profile

A 16 mm culture tube, which was equipped with a magnetic stir bar and charged with CuI (0.0625 mmol), ABNO (0.0625 mmol), 4,4'-*t*Bu<sub>2</sub>bpy (0.0625 mmol) and DMAP (0.125 mmol) was evacuated and backfilled with oxygen (this process was repeated 3 times). 4-Methoxybenzylamine **1a** (1.25 mmol) in CH<sub>3</sub>CN (5.0 mL) was added. An aliquot was taken from the reaction mixture and the product yield was monitored by <sup>1</sup>H NMR using an internal standard (1,1,2,2-tetrachloroethane) in the indicated interval.

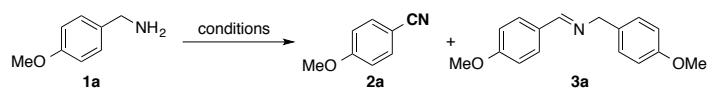

## 10. Cu/nitroxyl-catalyzed oxidation of alcohol to nitriles with NH<sub>3</sub> (aq) (Scheme 2).

A 16 mm culture tube, which was equipped with a magnetic stir bar and charged with Cu, nitroxyl, ligand, ammonium salt, and base was evacuated and backfilled with oxygen (this process was repeated a total of 3 times). After NH<sub>3</sub> (aq) (2.2 equiv) was added, 4-methoxybenzylamine (0.3 mmol) was added with solvent (2.0 mL). The solution was stirred for 15 h at indicated temperature under O<sub>2</sub> balloon, then the reaction was diluted by adding EtOAc and aqueous NH<sub>4</sub>Cl solution. Two layers were separated, and the aqueous layer was extracted with EtOAc. The combined organic layers were dried over MgSO<sub>4</sub>, filtered, and concentrated *in vacuo*. The <sup>1</sup>H NMR yield of desired product was determined by integration using an internal standard (1,1,2,2-tetrachloroethane).

**Table S3.** Optimization of Cu/nitroxyl catalyzed alcohol oxidation with NH<sub>3</sub> (aq) into nitriles

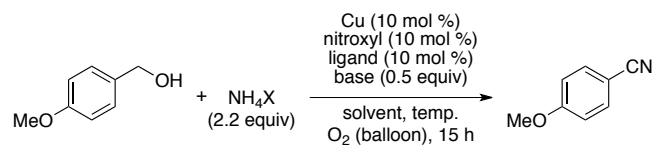

| entry | Cu source                                            | nitroxyl                                                                                     | NH <sub>4</sub> X                | ligand | base | solvent            | temp. (°C) | yield (%) |
|-------|------------------------------------------------------|----------------------------------------------------------------------------------------------|----------------------------------|--------|------|--------------------|------------|-----------|
| 1     | -                                                    | <br>TEMPO   | NH <sub>3</sub> (aq)             | -      | -    | CH <sub>3</sub> CN | 60         | 0         |
| 2     | CuCl                                                 | TEMPO                                                                                        | NH <sub>3</sub> (aq)             | -      | -    | CH <sub>3</sub> CN | 60         | 10        |
| 3     | CuBr                                                 | TEMPO                                                                                        | NH <sub>3</sub> (aq)             | -      | -    | CH <sub>3</sub> CN | 60         | 20        |
| 4     | CuI                                                  | TEMPO                                                                                        | NH <sub>3</sub> (aq)             | -      | -    | CH <sub>3</sub> CN | 60         | 50        |
| 5     | copper(I) thiophene-2-carboxylate                    | TEMPO                                                                                        | NH <sub>3</sub> (aq)             | -      | -    | CH <sub>3</sub> CN | 60         | 48        |
| 6     | Cu <sub>2</sub> O                                    | TEMPO                                                                                        | NH <sub>3</sub> (aq)             | -      | -    | CH <sub>3</sub> CN | 60         | 0         |
| 7     | Cu(CH <sub>3</sub> CN) <sub>4</sub> OTf              | TEMPO                                                                                        | NH <sub>3</sub> (aq)             | -      | -    | CH <sub>3</sub> CN | 60         | 61        |
| 8     | Cu(CH <sub>3</sub> CN) <sub>4</sub> PF <sub>6</sub>  | TEMPO                                                                                        | NH <sub>3</sub> (aq)             | -      | -    | CH <sub>3</sub> CN | 60         | 62        |
| 9     | CuCl <sub>2</sub>                                    | TEMPO                                                                                        | NH <sub>3</sub> (aq)             | -      | -    | CH <sub>3</sub> CN | 60         | 5         |
| 10    | CuBr <sub>2</sub>                                    | TEMPO                                                                                        | NH <sub>3</sub> (aq)             | -      | -    | CH <sub>3</sub> CN | 60         | 16        |
| 11    | Cu(NO <sub>3</sub> ) <sub>2</sub> ·3H <sub>2</sub> O | TEMPO                                                                                        | NH <sub>3</sub> (aq)             | -      | -    | CH <sub>3</sub> CN | 60         | 20        |
| 12    | Cu(OTf) <sub>2</sub>                                 | TEMPO                                                                                        | NH <sub>3</sub> (aq)             | -      | -    | CH <sub>3</sub> CN | 60         | 65        |
| 13    | Cu(OAc) <sub>2</sub>                                 | TEMPO                                                                                        | NH <sub>3</sub> (aq)             | -      | -    | CH <sub>3</sub> CN | 60         | 30        |
| 14    | Cu(TFA) <sub>2</sub>                                 | TEMPO                                                                                        | NH <sub>3</sub> (aq)             | -      | -    | CH <sub>3</sub> CN | 60         | 52        |
| 15    | Cu(acac) <sub>2</sub>                                | TEMPO                                                                                        | NH <sub>3</sub> (aq)             | -      | -    | CH <sub>3</sub> CN | 60         | 13        |
| 16    | CuO                                                  | TEMPO                                                                                        | NH <sub>3</sub> (aq)             | -      | -    | CH <sub>3</sub> CN | 60         | 0         |
| 17    | Cu(OTf) <sub>2</sub>                                 | TEMPO                                                                                        | NH <sub>4</sub> HCO <sub>3</sub> | -      | -    | CH <sub>3</sub> CN | 60         | 39        |
| 18    | Cu(OTf) <sub>2</sub>                                 | TEMPO                                                                                        | NH <sub>4</sub> OAc              | -      | -    | CH <sub>3</sub> CN | 60         | 3         |
| 19    | Cu(OTf) <sub>2</sub>                                 | TEMPO                                                                                        | NH <sub>4</sub> NO <sub>3</sub>  | -      | -    | CH <sub>3</sub> CN | 60         | 1         |
| 20    | Cu(OTf) <sub>2</sub>                                 | TEMPO                                                                                        | NH <sub>4</sub> BF <sub>4</sub>  | -      | -    | CH <sub>3</sub> CN | 60         | 36        |
| 21    | Cu(OTf) <sub>2</sub>                                 | TEMPO                                                                                        | NH <sub>3</sub> (aq)             | -      | -    | CH <sub>3</sub> CN | 40         | 34        |
| 22    | Cu(OTf) <sub>2</sub>                                 |           | NH <sub>3</sub> (aq)             | -      | -    | CH <sub>3</sub> CN | 40         | 27        |
| 23    | Cu(OTf) <sub>2</sub>                                 |           | NH <sub>3</sub> (aq)             | -      | -    | CH <sub>3</sub> CN | 40         | 6         |
| 24    | Cu(OTf) <sub>2</sub>                                 |           | NH <sub>3</sub> (aq)             | -      | -    | CH <sub>3</sub> CN | 40         | 34        |
| 25    | Cu(OTf) <sub>2</sub>                                 | <br>AZADO | NH <sub>3</sub> (aq)             | -      | -    | CH <sub>3</sub> CN | 40         | 34        |
| 26    | Cu(OTf) <sub>2</sub>                                 |           | NH <sub>3</sub> (aq)             | -      | -    | CH <sub>3</sub> CN | 40         | 0         |

|           |                            |                                                                                   |                            |                                                                                   |                                 |                                      |           |           |
|-----------|----------------------------|-----------------------------------------------------------------------------------|----------------------------|-----------------------------------------------------------------------------------|---------------------------------|--------------------------------------|-----------|-----------|
| 27        | Cu(OTf) <sub>2</sub>       |  | NH <sub>3</sub> (aq)       | -                                                                                 | -                               | CH <sub>3</sub> CN                   | 40        | 0         |
| 28        | Cu(OTf) <sub>2</sub>       | TEMPO                                                                             | NH <sub>3</sub> (aq)       | pyridine                                                                          | -                               | CH <sub>3</sub> CN                   | 40        | 34        |
| 29        | Cu(OTf) <sub>2</sub>       | TEMPO                                                                             | NH <sub>3</sub> (aq)       |  | -                               | CH <sub>3</sub> CN                   | 40        | 20        |
| 30        | Cu(OTf) <sub>2</sub>       | TEMPO                                                                             | NH <sub>3</sub> (aq)       |  | -                               | CH <sub>3</sub> CN                   | 40        | 3         |
| 31        | Cu(OTf) <sub>2</sub>       | TEMPO                                                                             | NH <sub>3</sub> (aq)       |  | -                               | CH <sub>3</sub> CN                   | 40        | 14        |
| 32        | Cu(OTf) <sub>2</sub>       | TEMPO                                                                             | NH <sub>3</sub> (aq)       |  | -                               | CH <sub>3</sub> CN                   | 40        | 20        |
| 33        | Cu(OTf) <sub>2</sub>       | TEMPO                                                                             | NH <sub>3</sub> (aq)       |  | -                               | CH <sub>3</sub> CN                   | 40        | 27        |
| 34        | Cu(OTf) <sub>2</sub>       | TEMPO                                                                             | NH <sub>3</sub> (aq)       |  | -                               | CH <sub>3</sub> CN                   | 40        | 35        |
| 35        | Cu(OTf) <sub>2</sub>       | TEMPO                                                                             | NH <sub>3</sub> (aq)       |  | -                               | CH <sub>3</sub> CN                   | 40        | 18        |
| 36        | Cu(OTf) <sub>2</sub>       | TEMPO                                                                             | NH <sub>3</sub> (aq)       |  | -                               | CH <sub>3</sub> CN                   | 40        | 12        |
| 37        | Cu(OTf) <sub>2</sub>       | TEMPO                                                                             | NH <sub>3</sub> (aq)       |  | -                               | CH <sub>3</sub> CN                   | 40        | 0         |
| 38        | Cu(OTf) <sub>2</sub>       | TEMPO                                                                             | NH <sub>3</sub> (aq)       | -                                                                                 | NaOH                            | CH <sub>3</sub> CN                   | 40        | 0         |
| 39        | Cu(OTf) <sub>2</sub>       | TEMPO                                                                             | NH <sub>3</sub> (aq)       | -                                                                                 | NaHCO <sub>3</sub>              | CH <sub>3</sub> CN                   | 40        | 10        |
| 40        | Cu(OTf) <sub>2</sub>       | TEMPO                                                                             | NH <sub>3</sub> (aq)       | -                                                                                 | Na <sub>2</sub> CO <sub>3</sub> | CH <sub>3</sub> CN                   | 40        | 35        |
| 41        | Cu(OTf) <sub>2</sub>       | TEMPO                                                                             | NH <sub>3</sub> (aq)       | -                                                                                 | KOH                             | CH <sub>3</sub> CN                   | 40        | 0         |
| 42        | Cu(OTf) <sub>2</sub>       | TEMPO                                                                             | NH <sub>3</sub> (aq)       | -                                                                                 | K <sub>2</sub> CO <sub>3</sub>  | CH <sub>3</sub> CN                   | 40        | 0         |
| 43        | Cu(OTf) <sub>2</sub>       | TEMPO                                                                             | NH <sub>3</sub> (aq)       | -                                                                                 | Cs <sub>2</sub> CO <sub>3</sub> | CH <sub>3</sub> CN                   | 40        | 0         |
| 44        | Cu(OTf) <sub>2</sub>       | TEMPO                                                                             | NH <sub>3</sub> (aq)       | -                                                                                 | -                               | DMF                                  | 60        | 74        |
| <b>45</b> | <b>Cu(OTf)<sub>2</sub></b> | <b>TEMPO</b>                                                                      | <b>NH<sub>3</sub> (aq)</b> | -                                                                                 | -                               | <b>DMSO</b>                          | <b>60</b> | <b>90</b> |
| 46        | Cu(OTf) <sub>2</sub>       | TEMPO                                                                             | NH <sub>3</sub> (aq)       | -                                                                                 | -                               | toluene                              | 60        | 0         |
| 47        | Cu(OTf) <sub>2</sub>       | TEMPO                                                                             | NH <sub>3</sub> (aq)       | -                                                                                 | -                               | ClCH <sub>2</sub> CH <sub>2</sub> Cl | 60        | 0         |
| 48        | Cu(OTf) <sub>2</sub>       | TEMPO                                                                             | NH <sub>3</sub> (aq)       | -                                                                                 | -                               | DME                                  | 60        | 16        |
| 49        | Cu(OTf) <sub>2</sub>       | TEMPO                                                                             | NH <sub>3</sub> (aq)       | -                                                                                 | -                               | ethanol                              | 60        | 40        |
| 50        | Cu(OTf) <sub>2</sub>       | TEMPO                                                                             | NH <sub>3</sub> (aq)       | -                                                                                 | -                               | ethylacetate                         | 60        | 15        |
| 51        | Cu(OTf) <sub>2</sub>       | TEMPO                                                                             | NH <sub>3</sub> (aq)       | -                                                                                 | -                               | 2-propanol                           | 60        | 76        |

## 11. References

- (1) (a) Shibuya, M.; Tomizawa, M.; Sasano, Y.; Iwabuchi, Y. *J. Org. Chem.* **2009**, *74*, 4619.
- (b) Sonobe, T.; Oisaki, K.; Kanai, M. *Chem. Sci.* **2012**, *3*, 3249.
- (2) Jensen, T.; Pedersen, H.; Bang-Andersen, B.; Madsen, R.; Jørgensen, M. *Angew. Chem., Int. Ed.* **2008**, *47*, 888.
- (3) Zhang, J.; Wang, Z.; Wang, Y.; Wan, C.; Zheng, X.; Wang, Z. *Green Chem.* **2009**, *11*, 1973.
- (4) Yang, C.; Williams, J. M. *Org. Lett.* **2004**, *6*, 2837.
- (5) Zhou, W.; Xu, J.; Zhang, L.; Jiao, N. *Org. Lett.* **2010**, *12*, 2888.
- (6) Malet-Sanz, L.; Madrzak, J.; Holvey, R. S.; Underwood, T. *Tetrahedron Lett.* **2009**, *50*, 7263.
- (7) Yeung, P. Y.; So, C. M.; Lau, C. P.; Kwong, F. Y. *Org. Lett.* **2011**, *13*, 648.
- (8) Aspinall, H. C.; Beckingham, O.; Farrar, M. D.; Greeves, N.; Thomas, C. D. *Tetrahedron Lett.* **2011**, *52*, 5120.
- (9) Yeung, P. Y.; So, C. M.; Lau, C. P.; Kwong, F. Y. *Angew. Chem., Int. Ed.* **2010**, *49*, 8918.
- (10) Mori, N.; Togo, H. *Synlett* **2005**, 1456.
- (11) Campbell, J. A.; McDougald, G.; McNab, H.; Rees, L. V. C.; Tyas, R. G. *Synthesis* **2007**, 3179.
- (12) Keumi, T.; Yamamoto, T.; Saga, H.; Kitajima, H. *Bull. Chem. Soc. Jpn.* **1981**, *54*, 1579.
- (13) Suzuki, H.; Fuchita, T.; Iwasa, A.; Mishina, T. *Synthesis* **1978**, 905.
- (14) Liu, L.; Zhang, S.; Fu, X.; Yan, C.-H. *Chem. Commun.* **2011**, *47*, 10148.

## 12. $^1\text{H}$ and $^{13}\text{C}$ NMR Spectra of Substrates

### 4-Methoxybenzonitrile

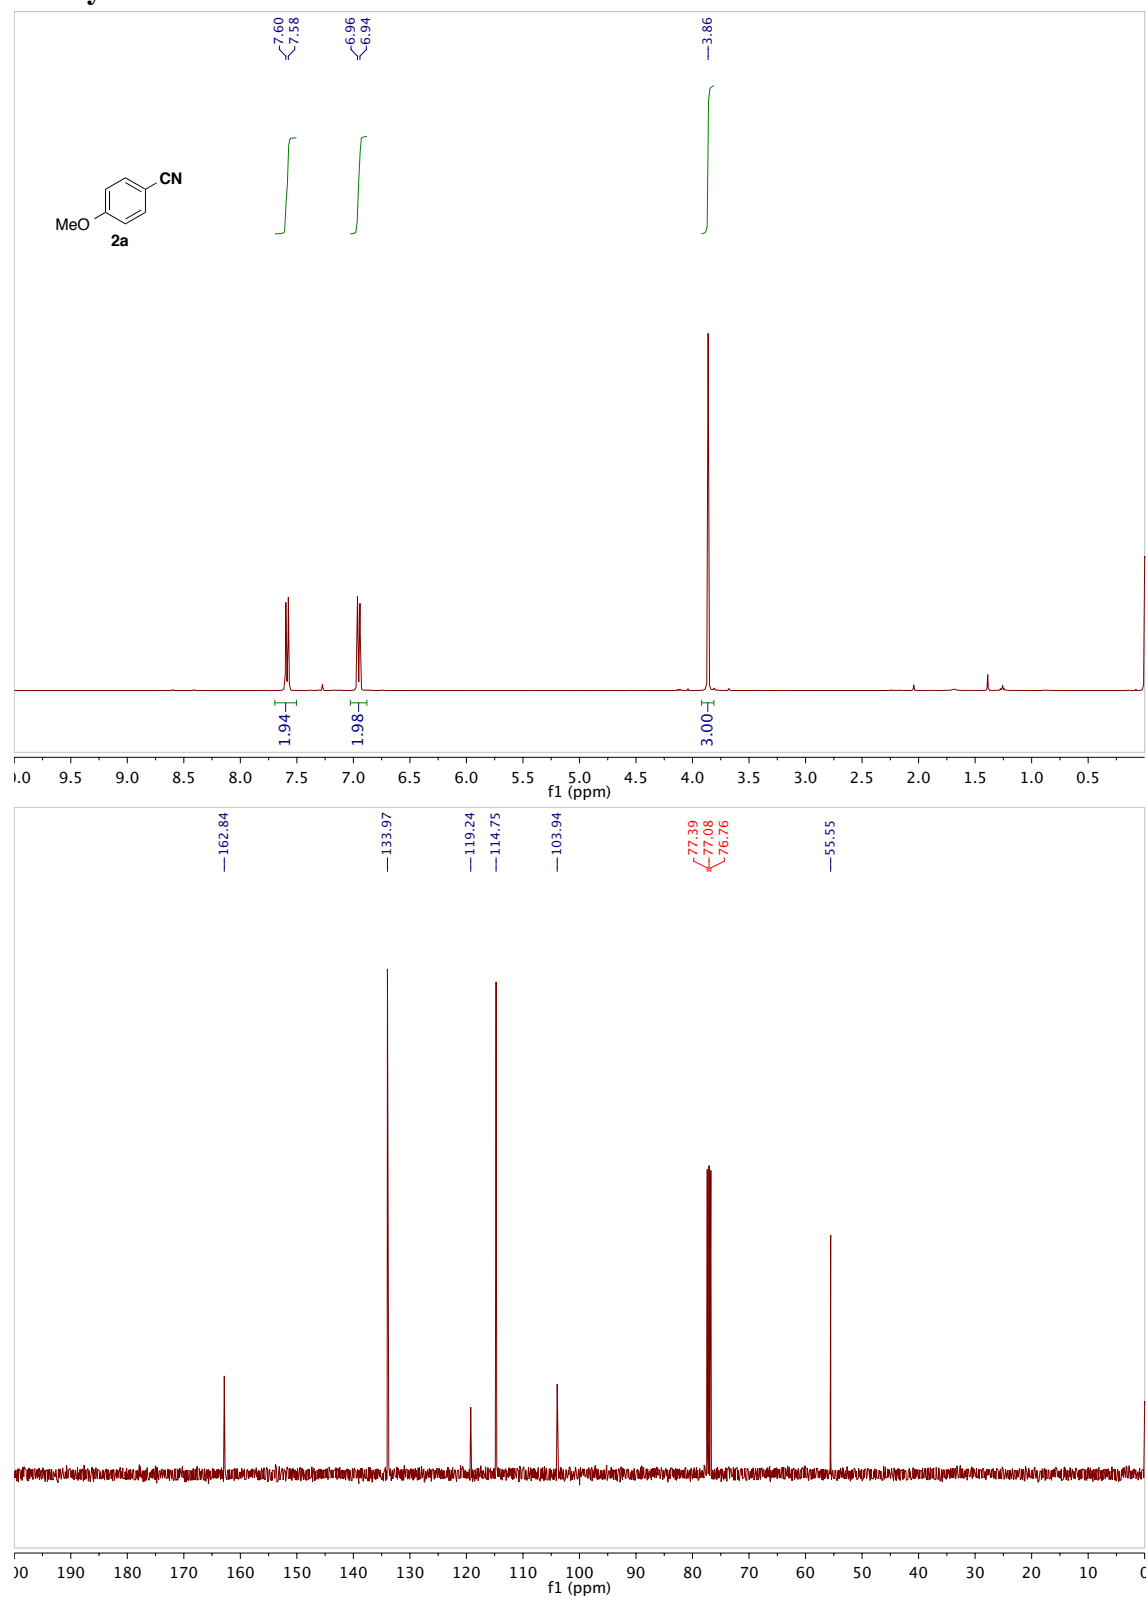



# 4-Methylbenzonitrile

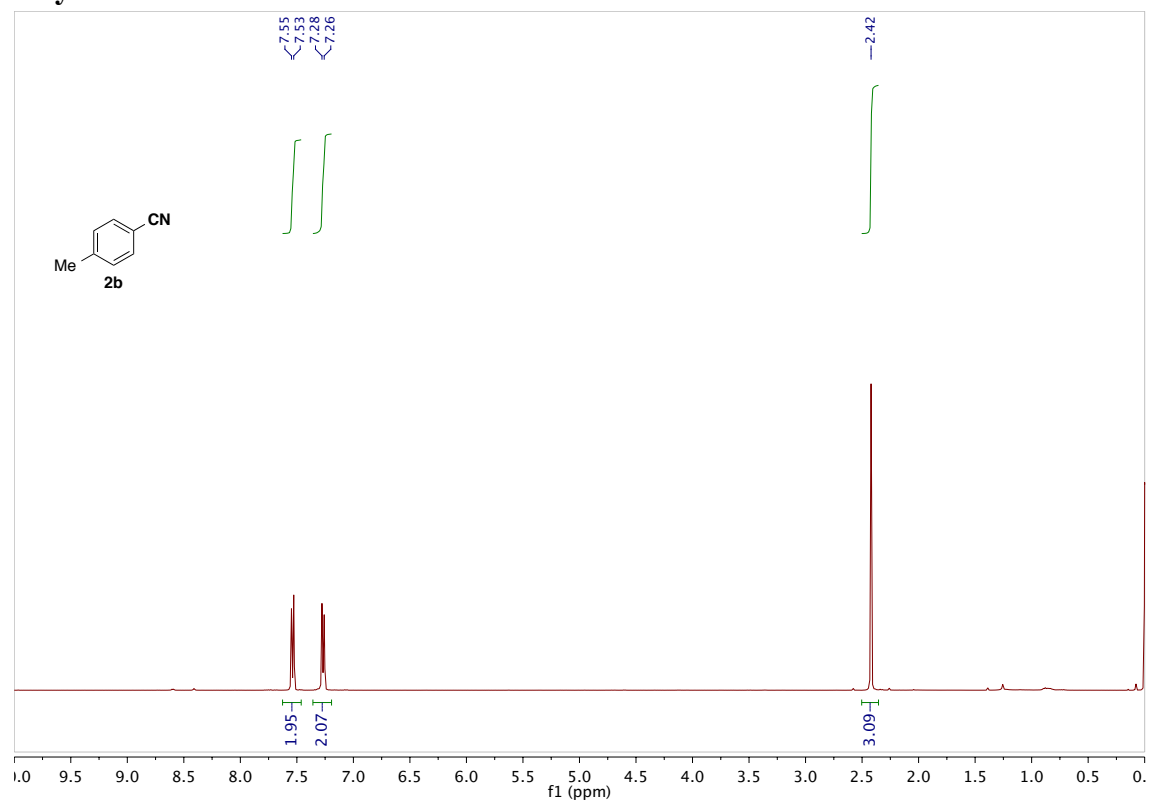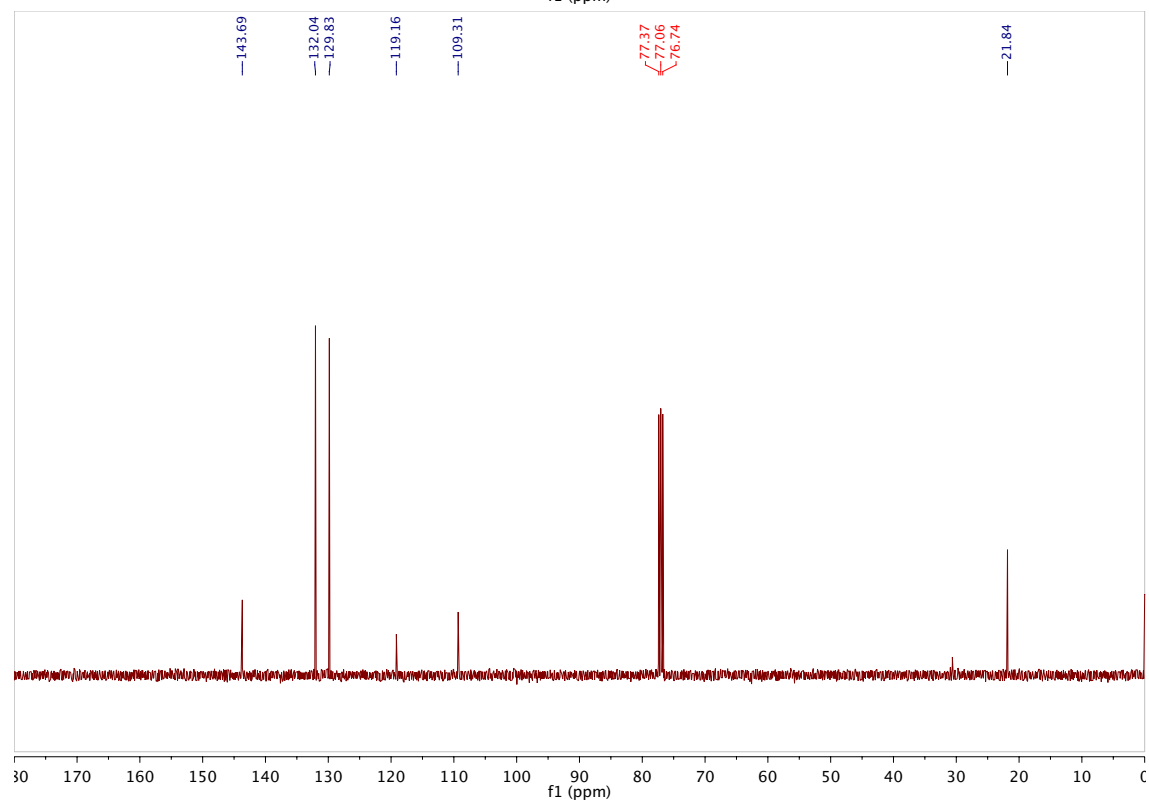

# 4-Bromobenzonitrile

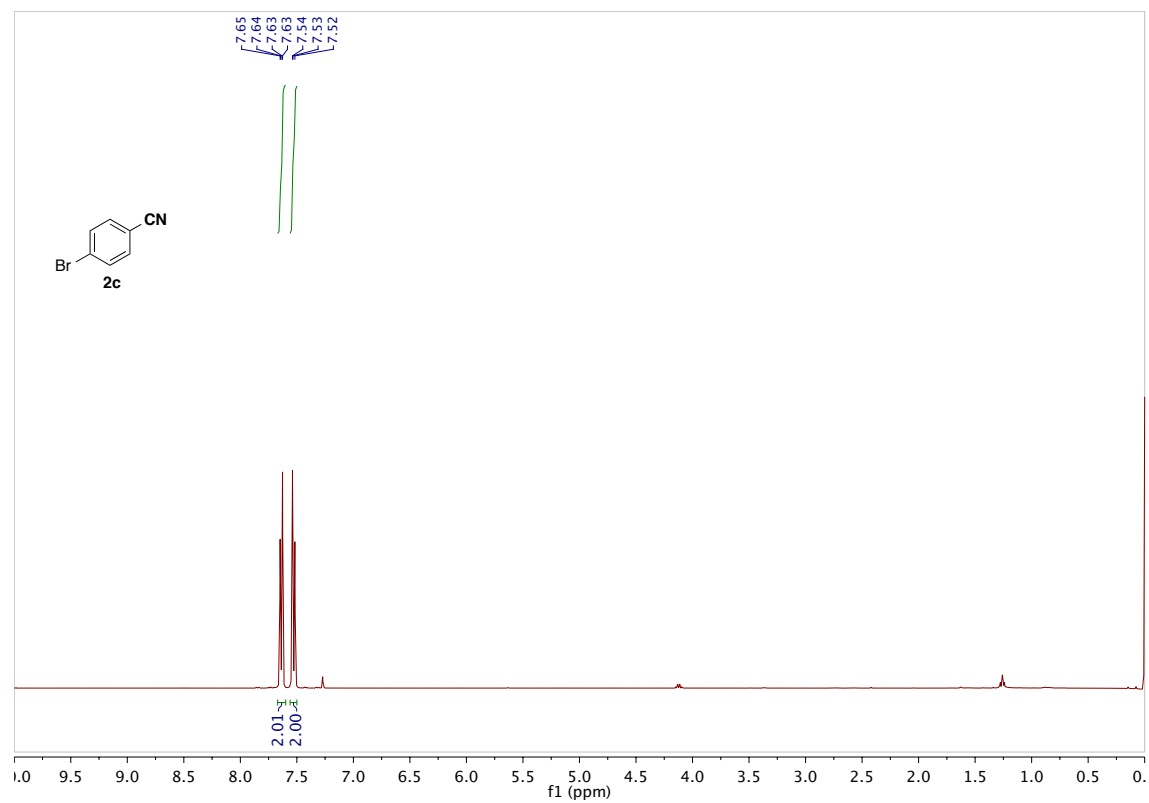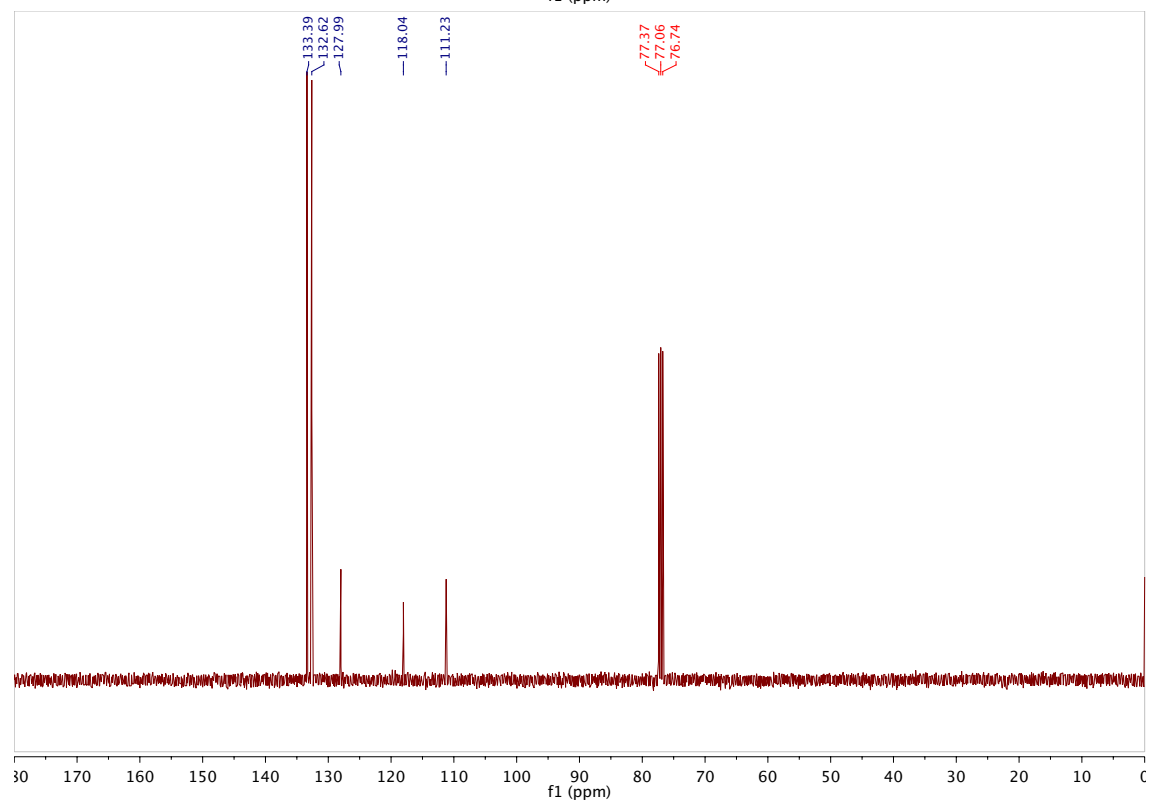

# 4-Chlorobenzonitrile

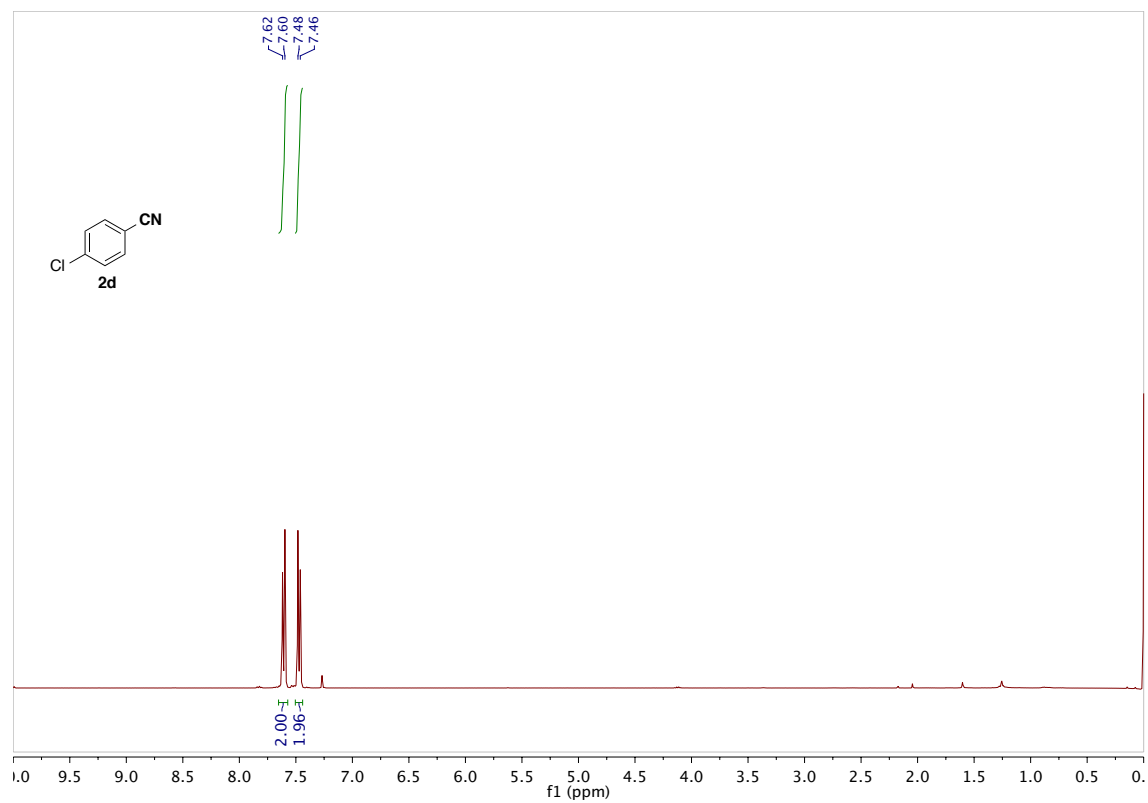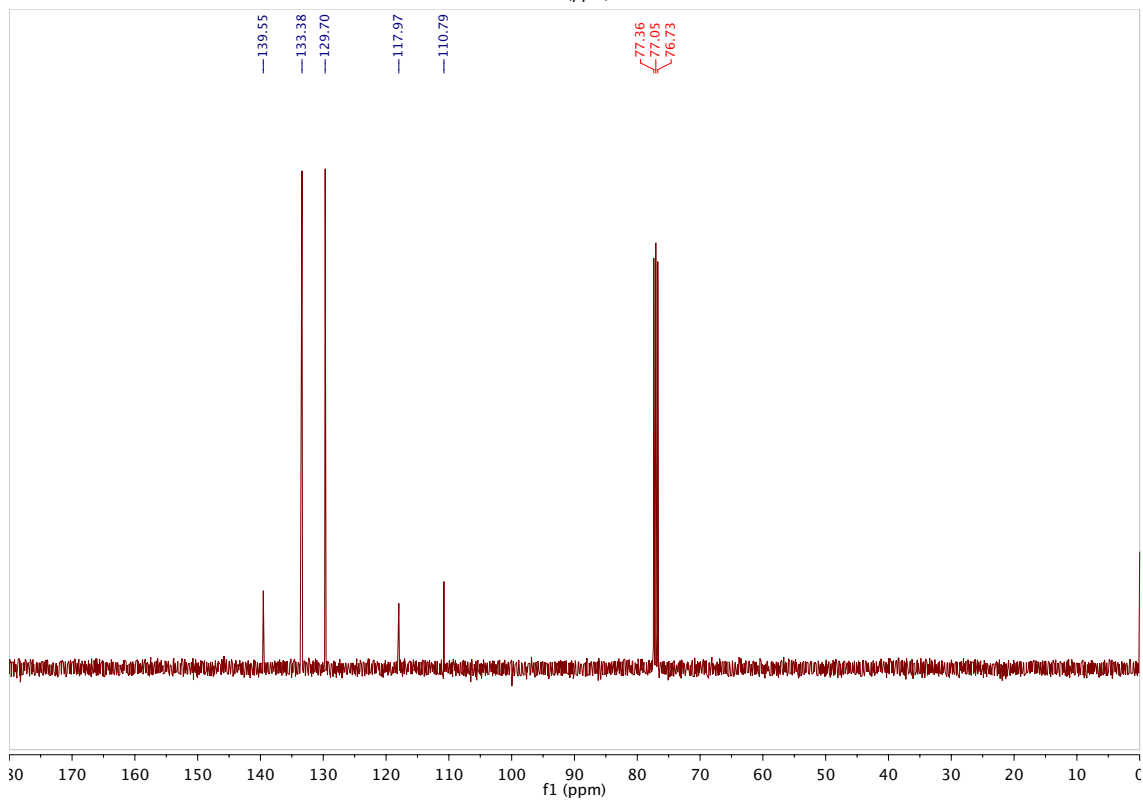

# 4-Trifluorobenzonitrile

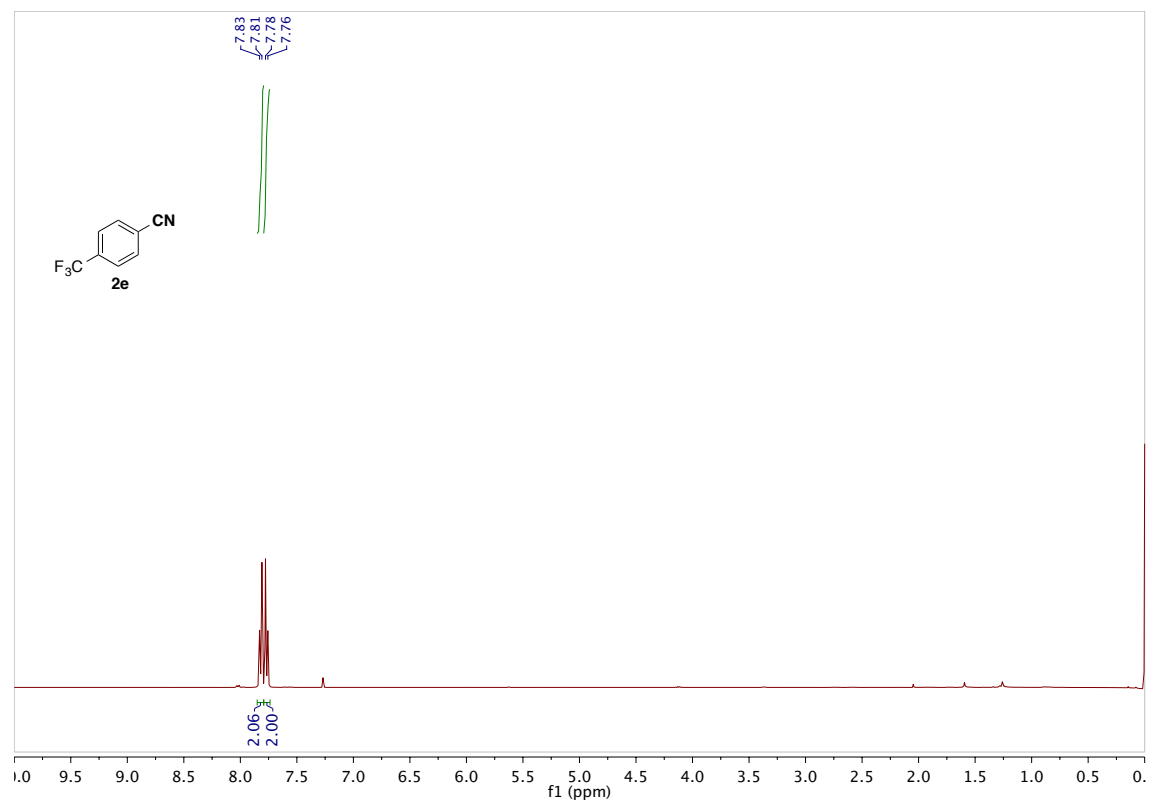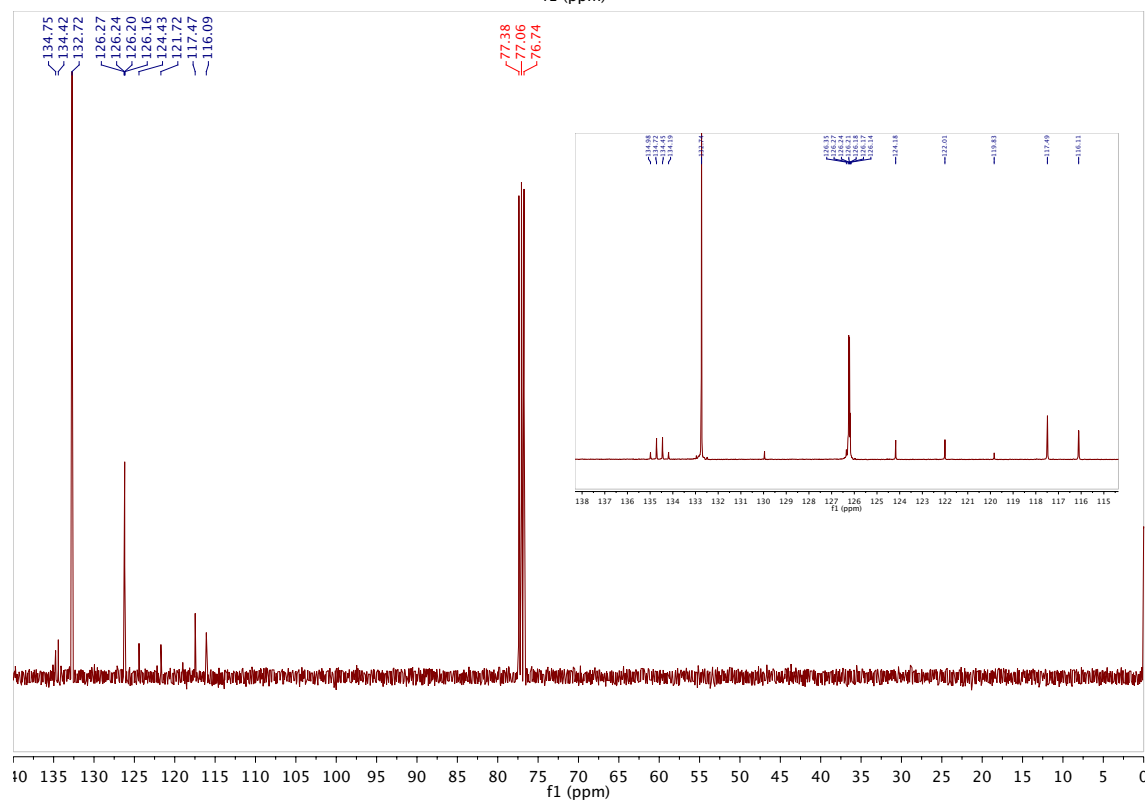

# 4-Nitrobenzonitrile

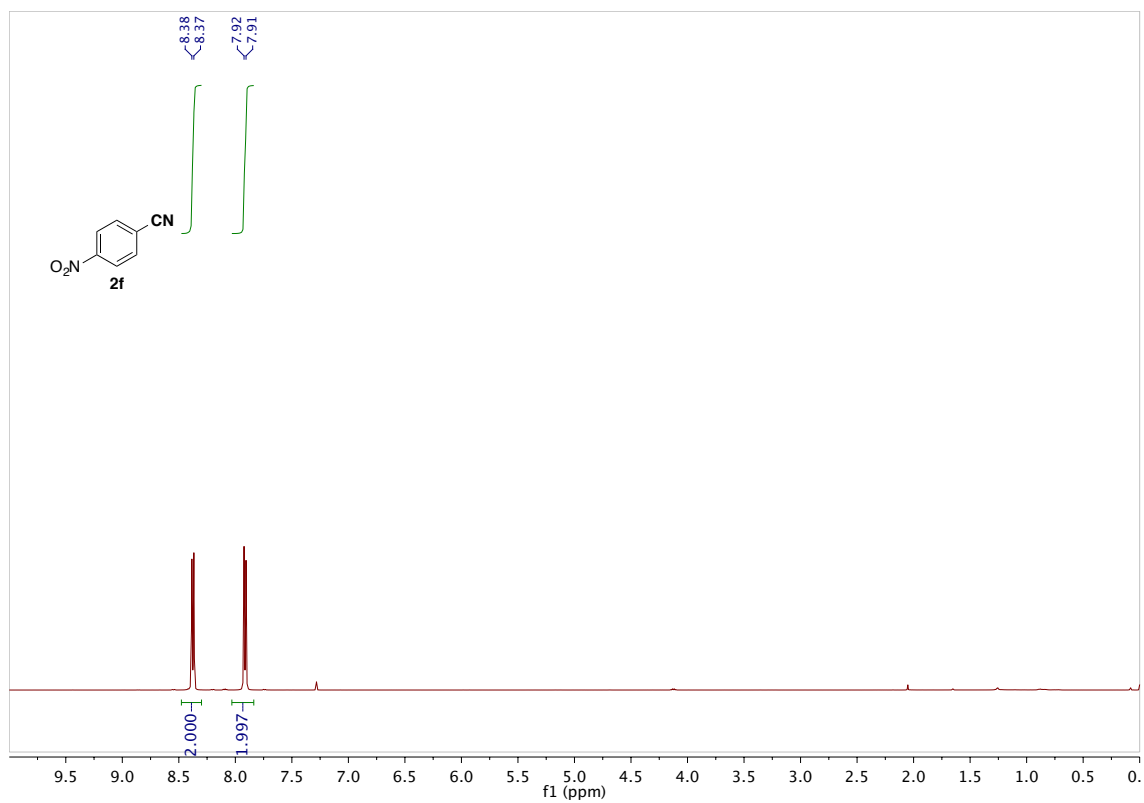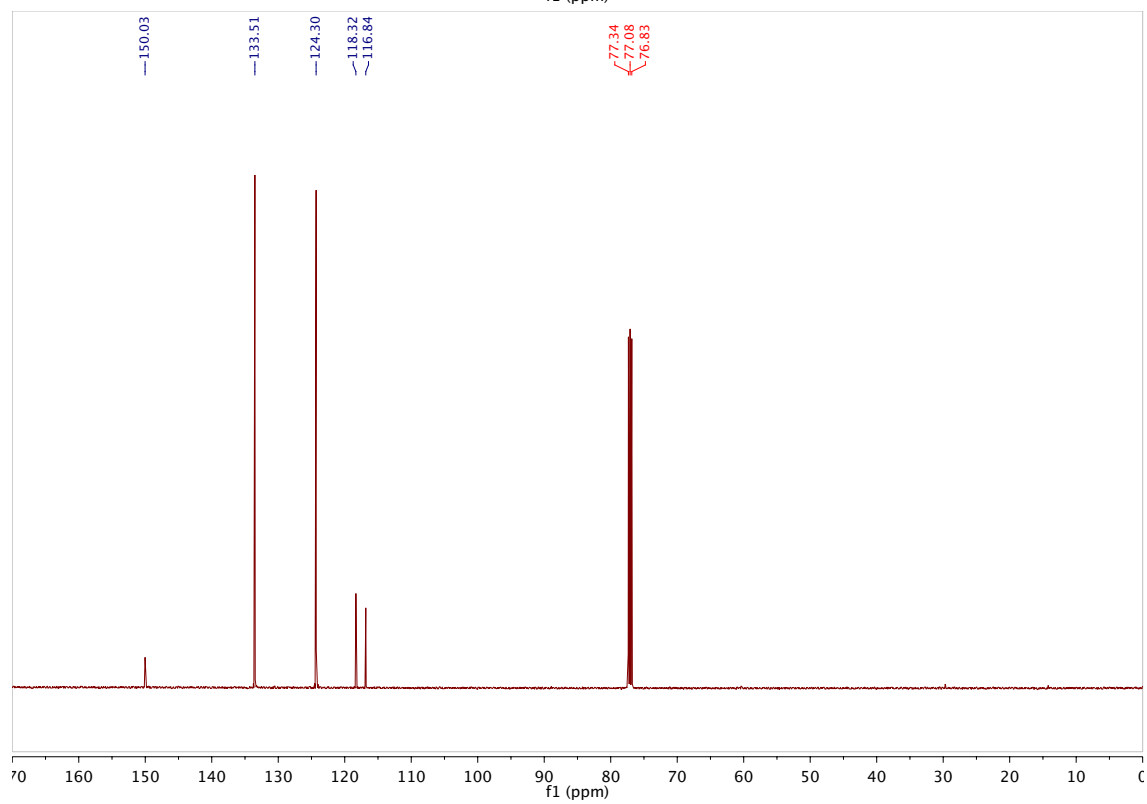

### 3-Methoxybenzonitrile

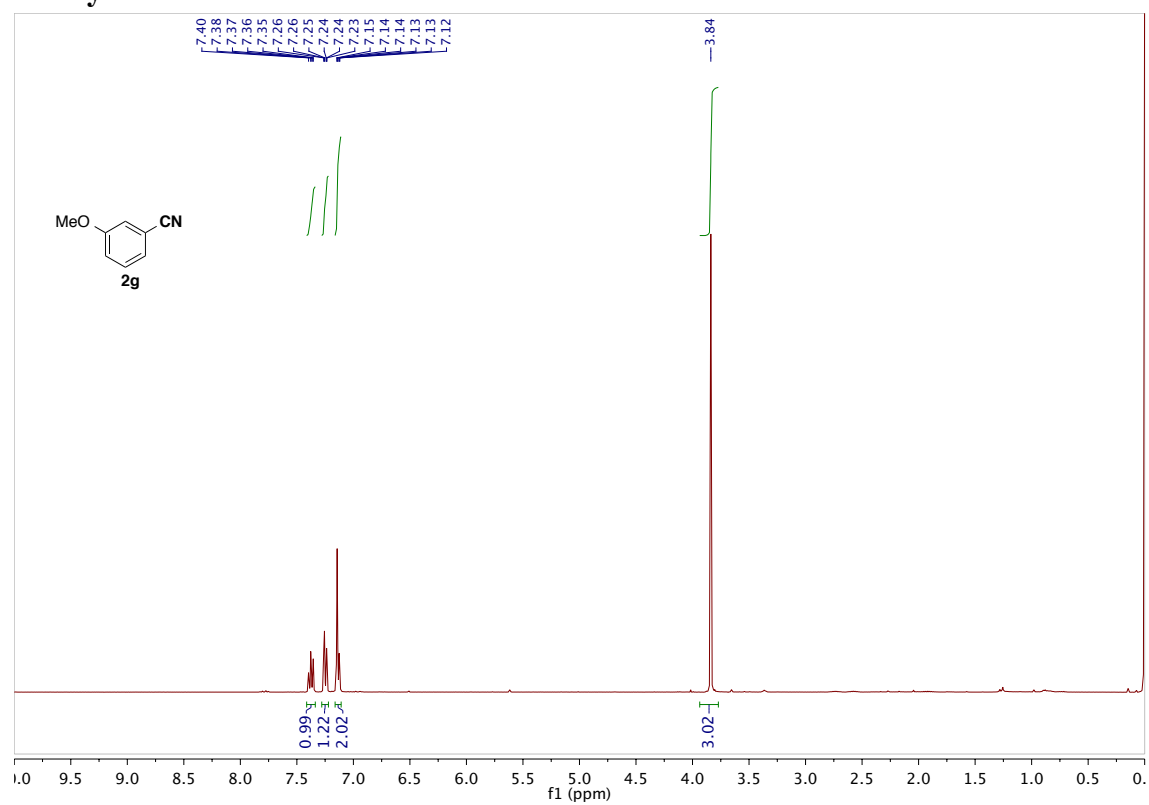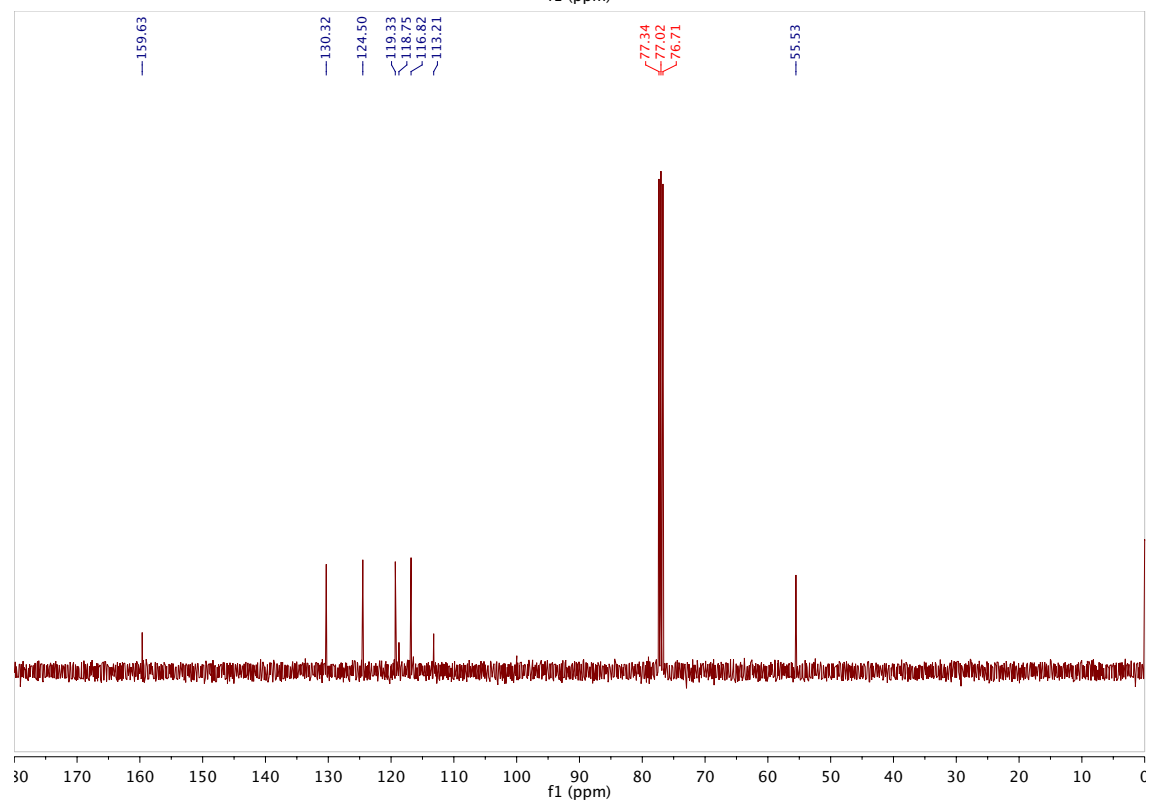

### 3-Chlorobenzonitrile

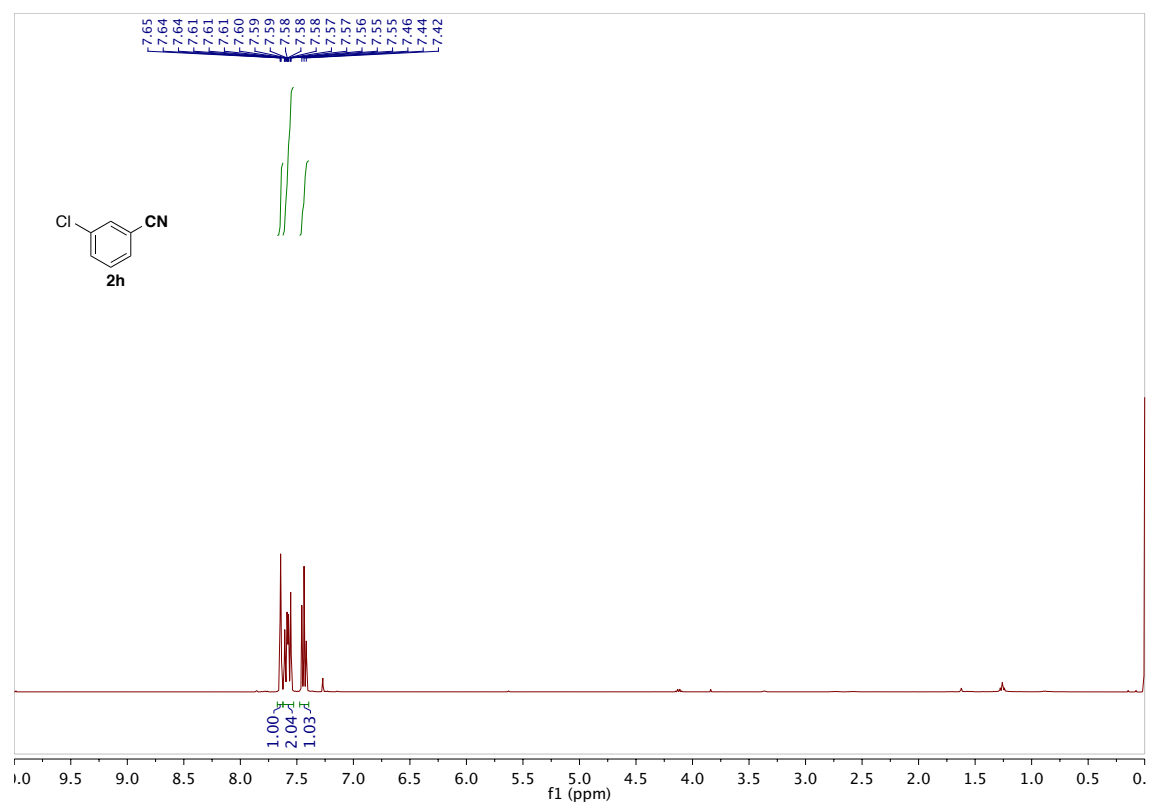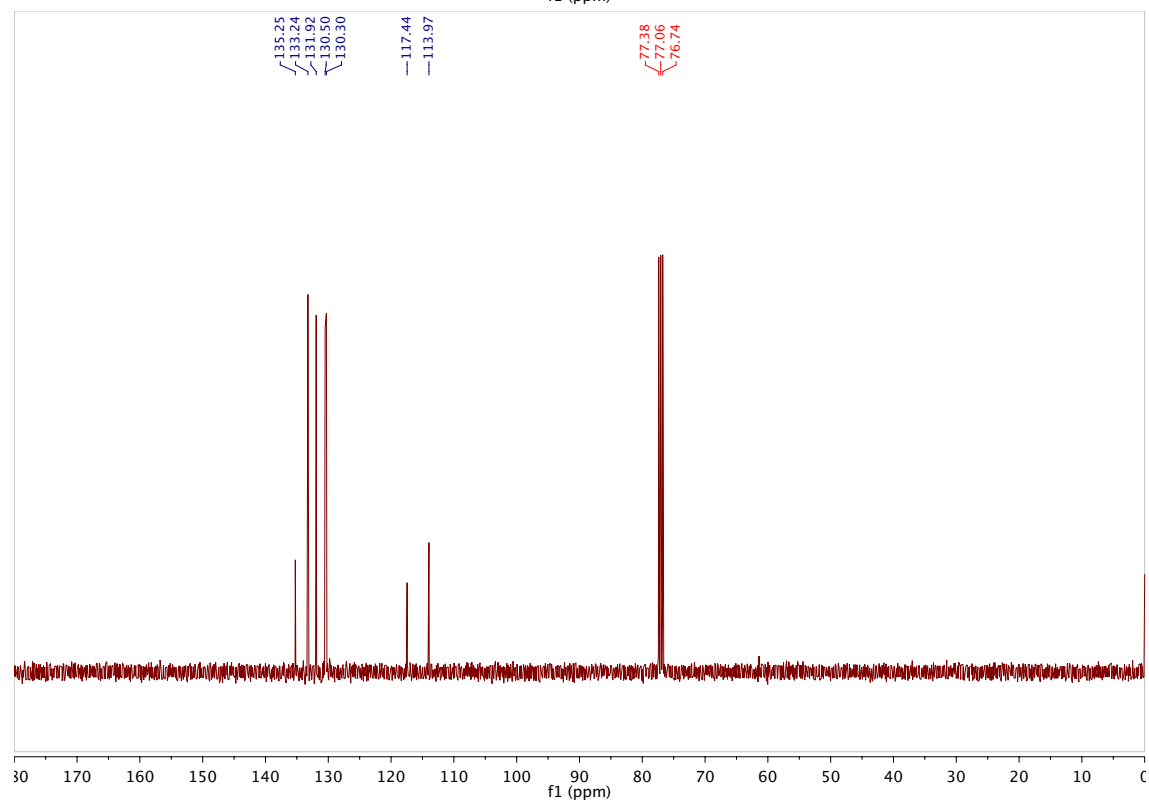

### 3-Iodobenzonitrile

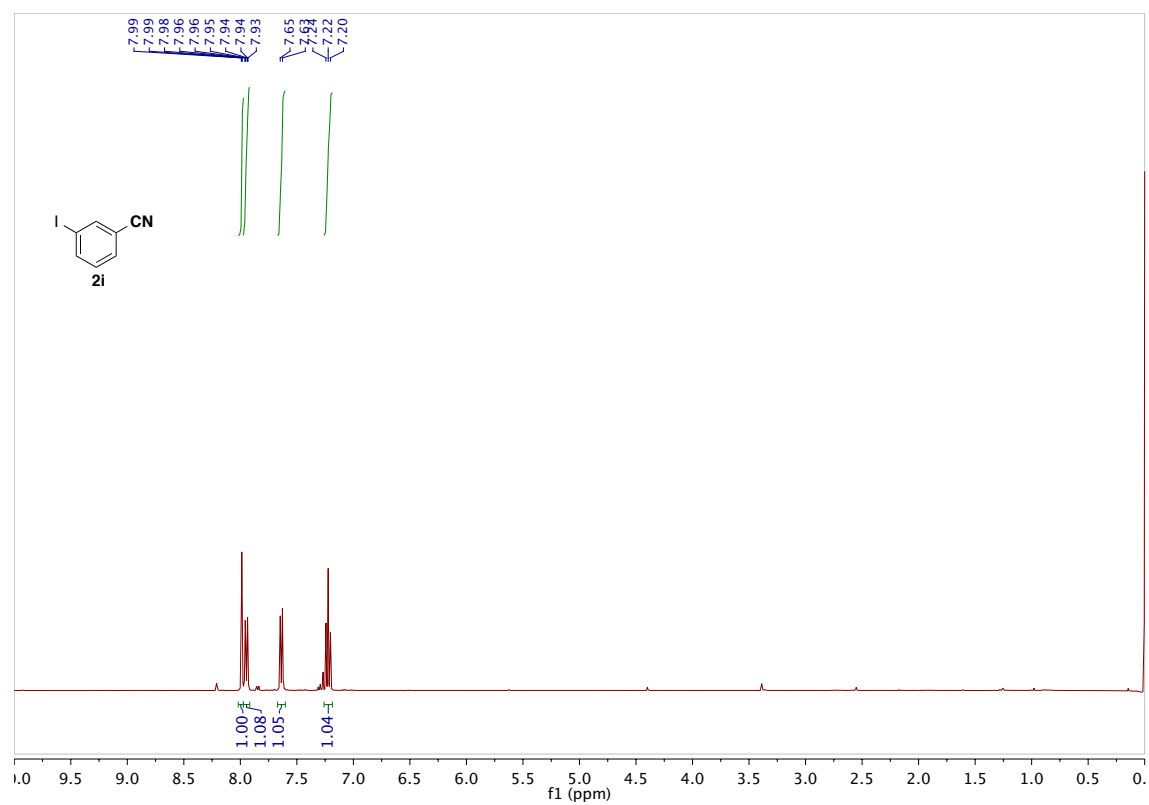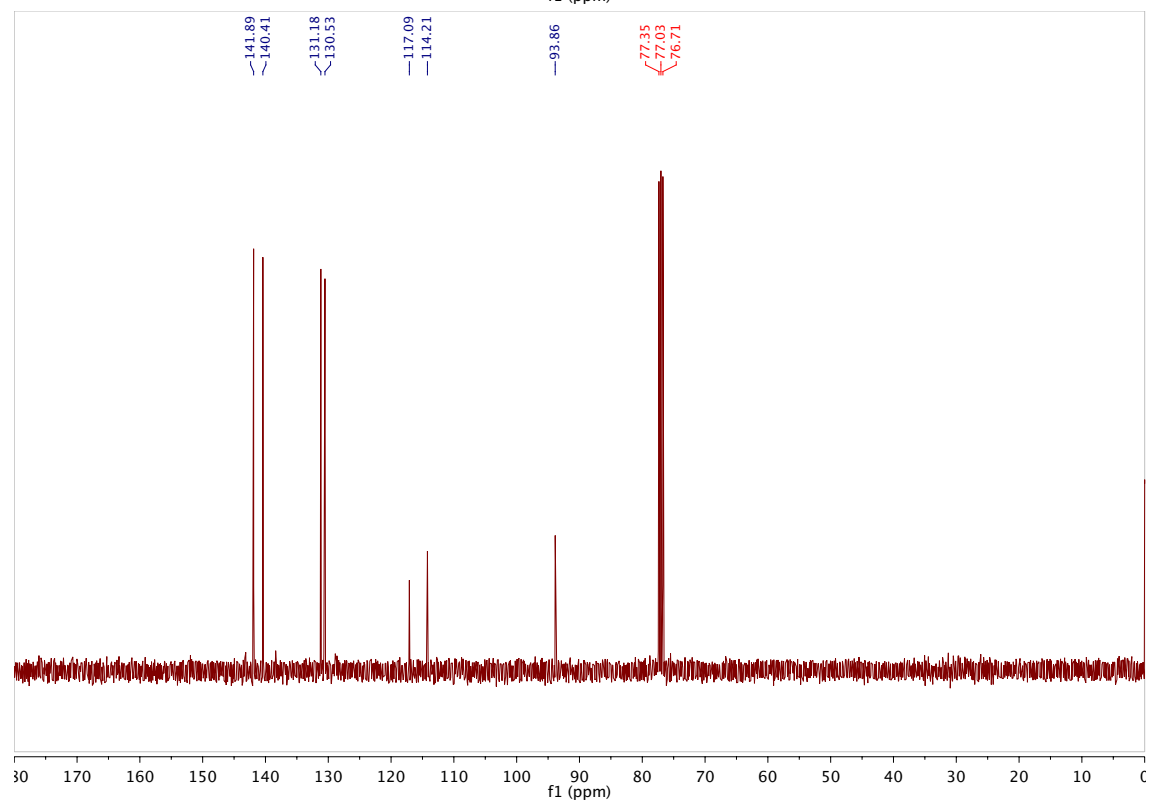



## 2-Methoxybenzonitrile

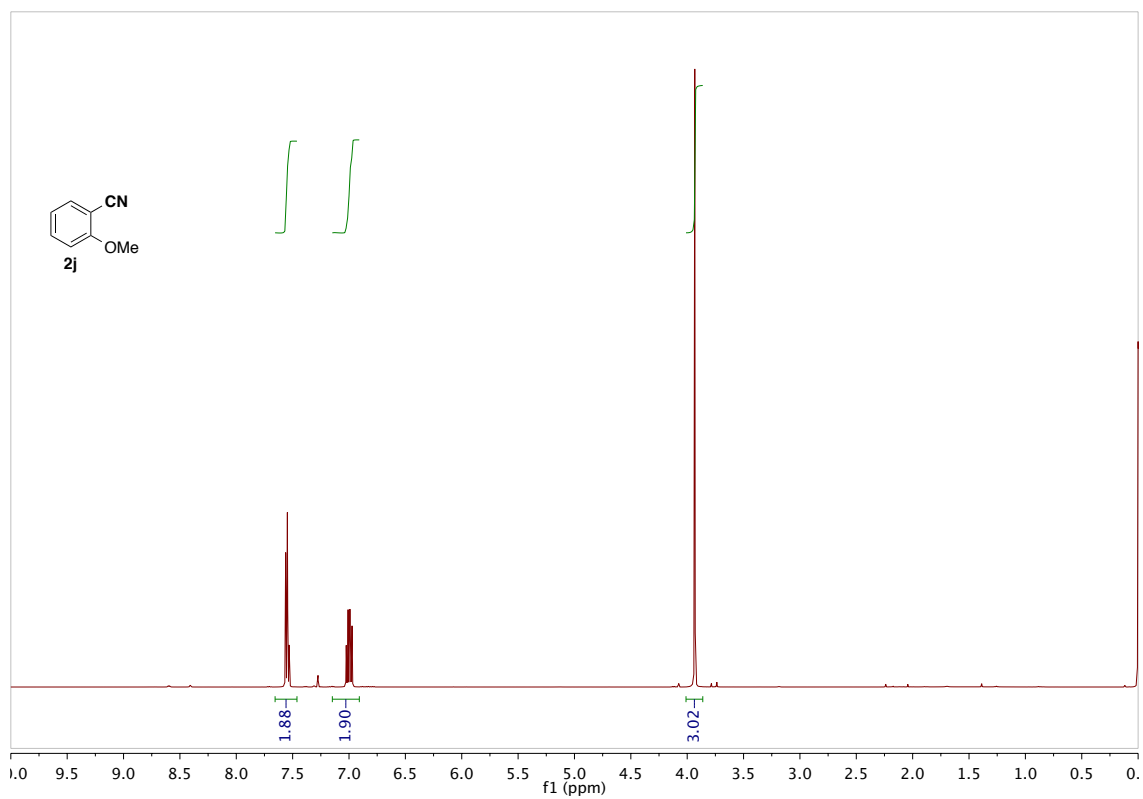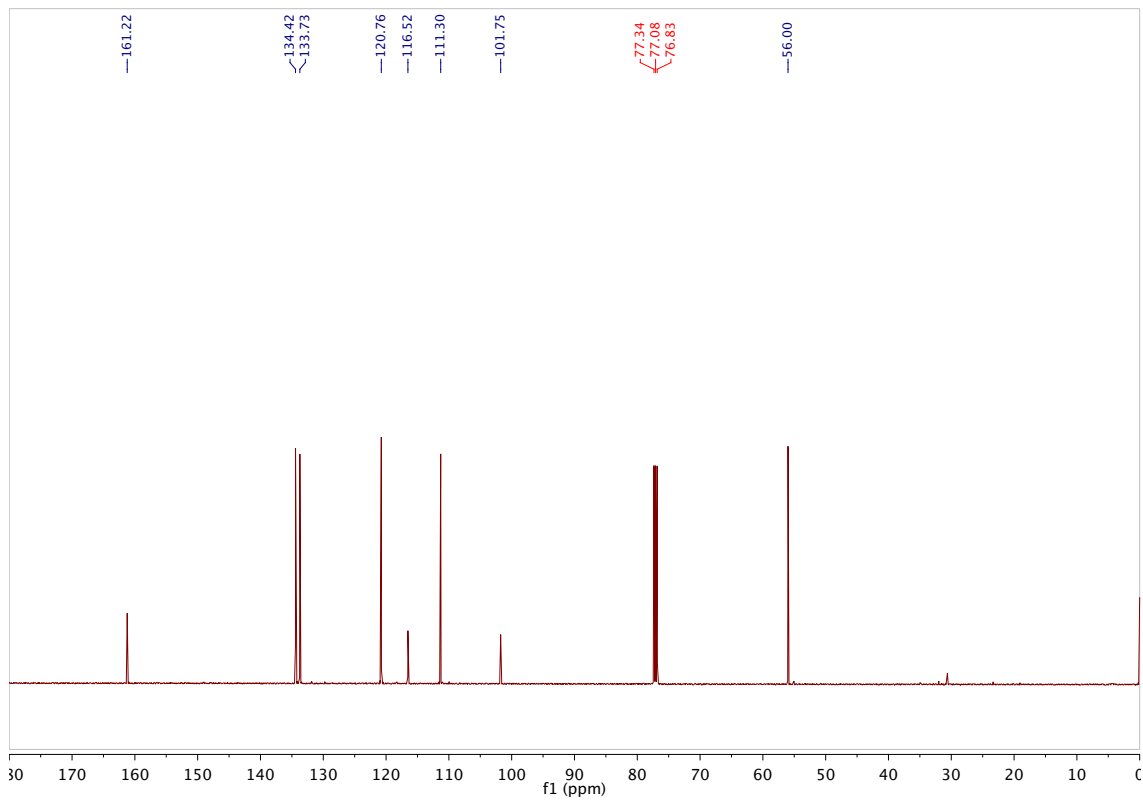

## 2-Methylbenzonitrile

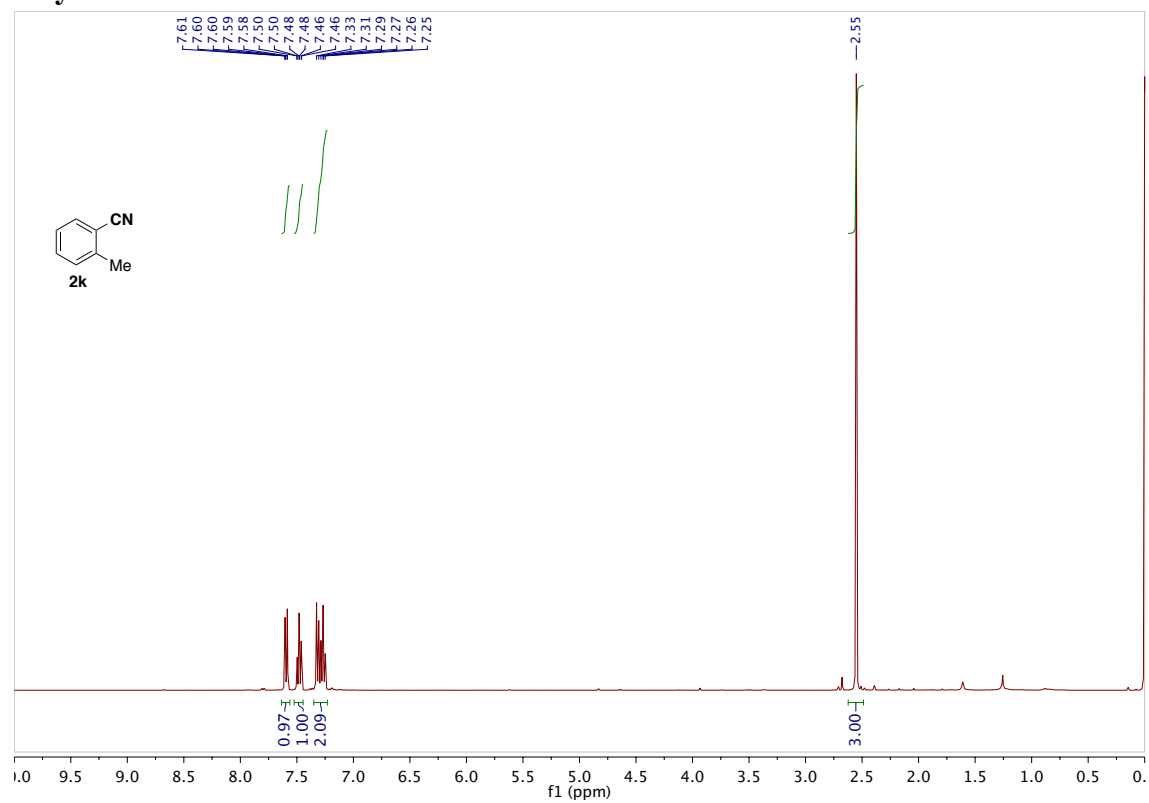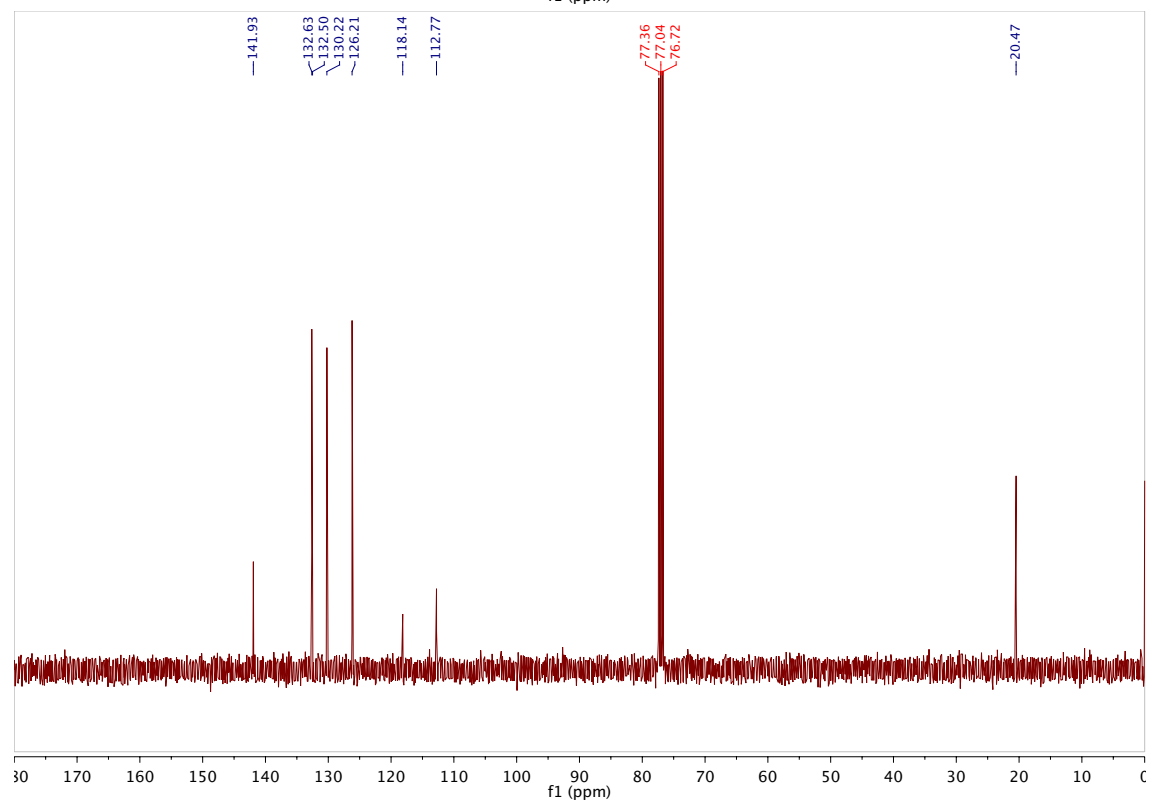

# Piperonylnitrile

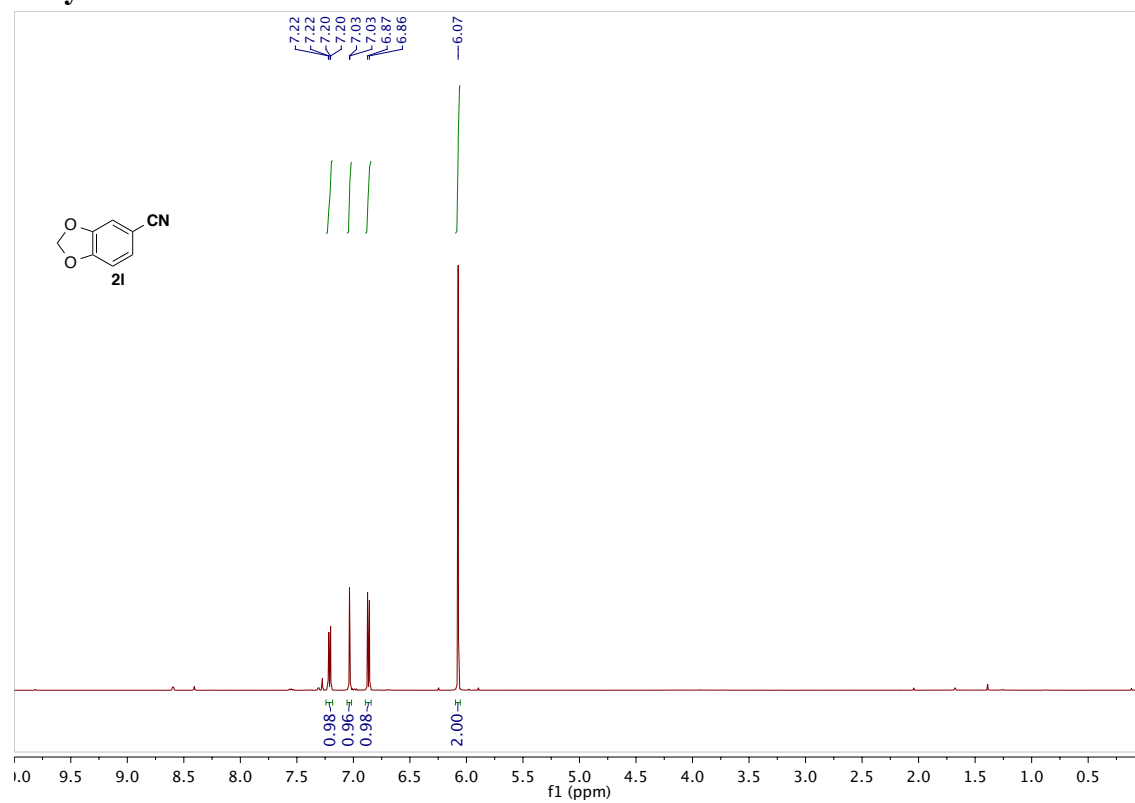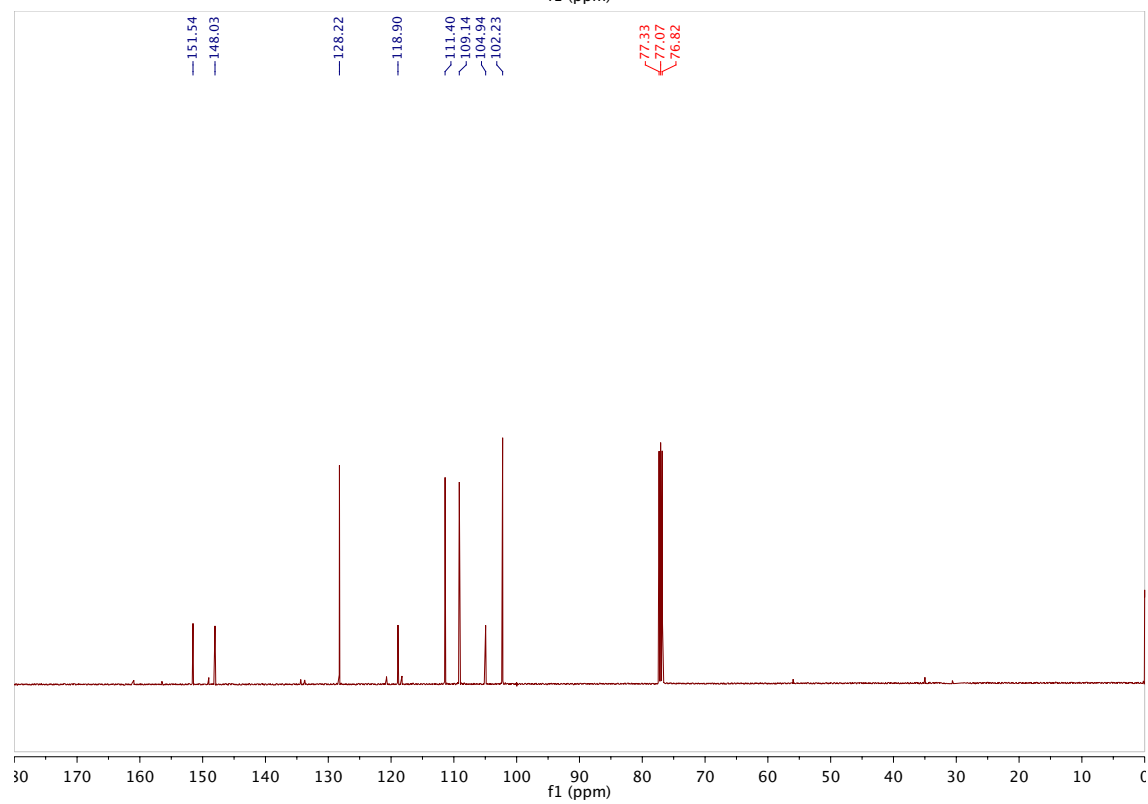

# 1-Naphthonitrile

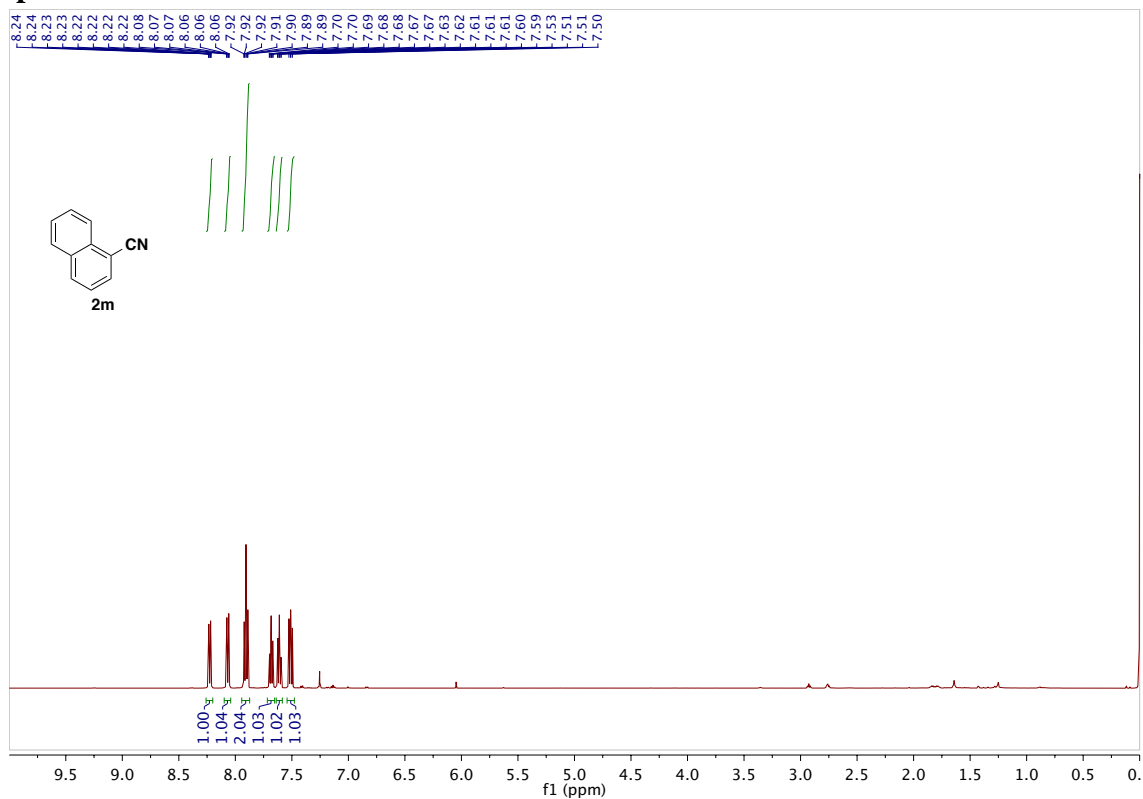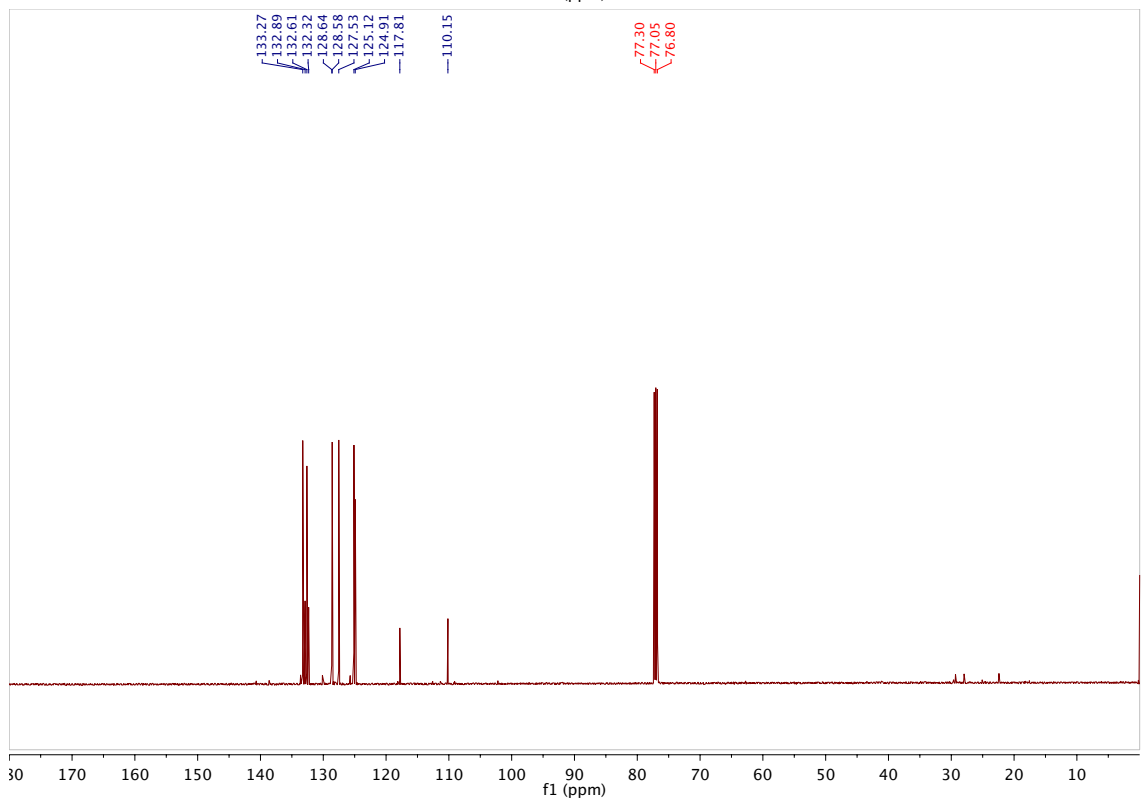

## 2-Furonitrile

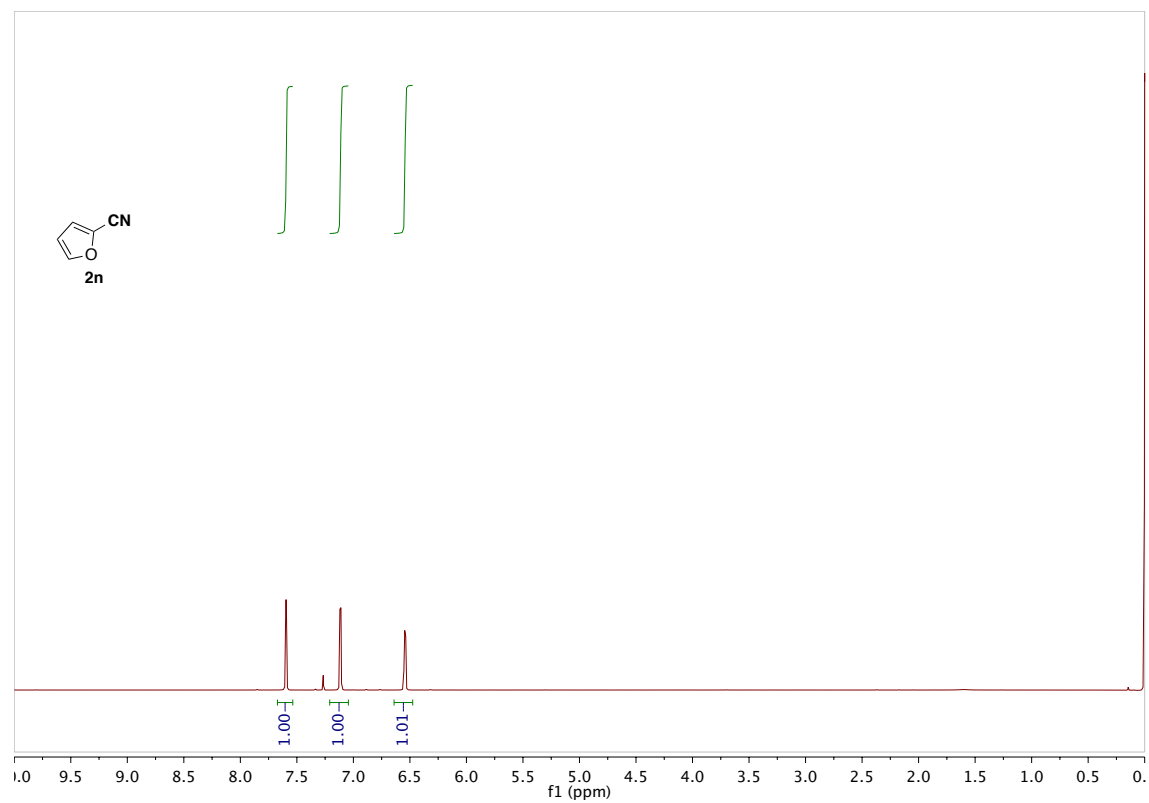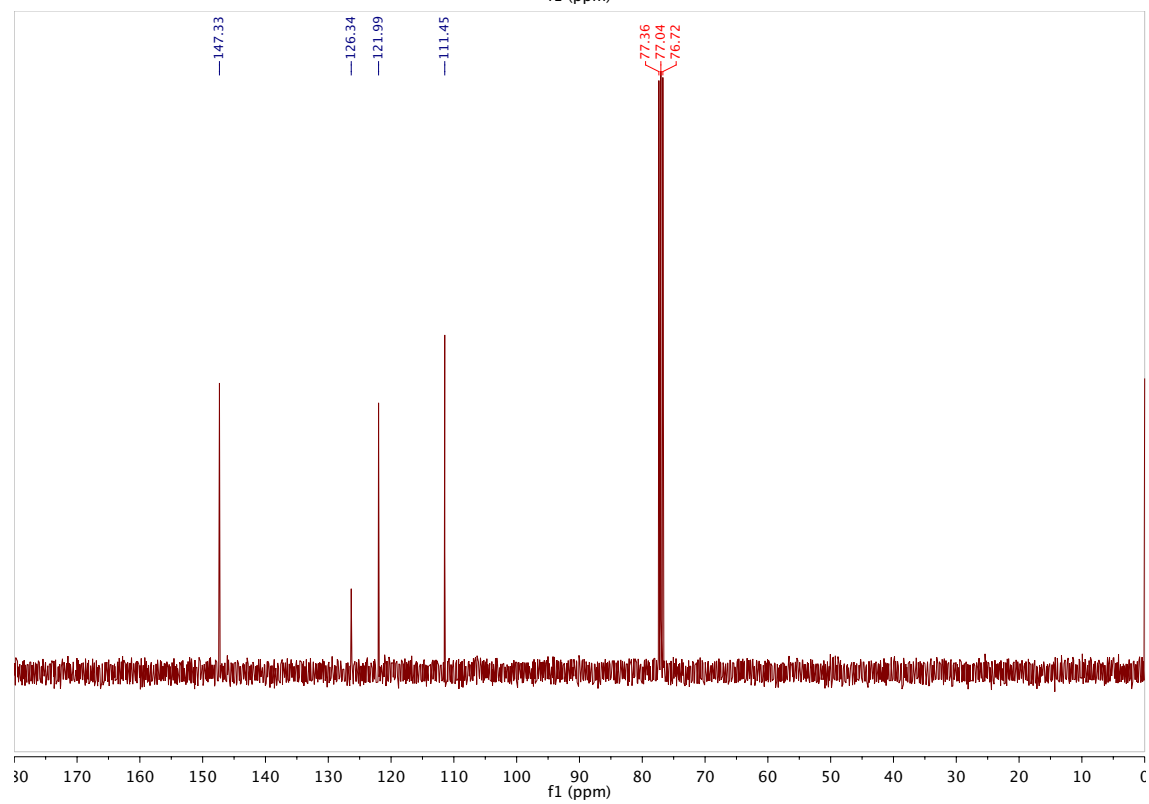

# 1,3-Dicyanobenzene

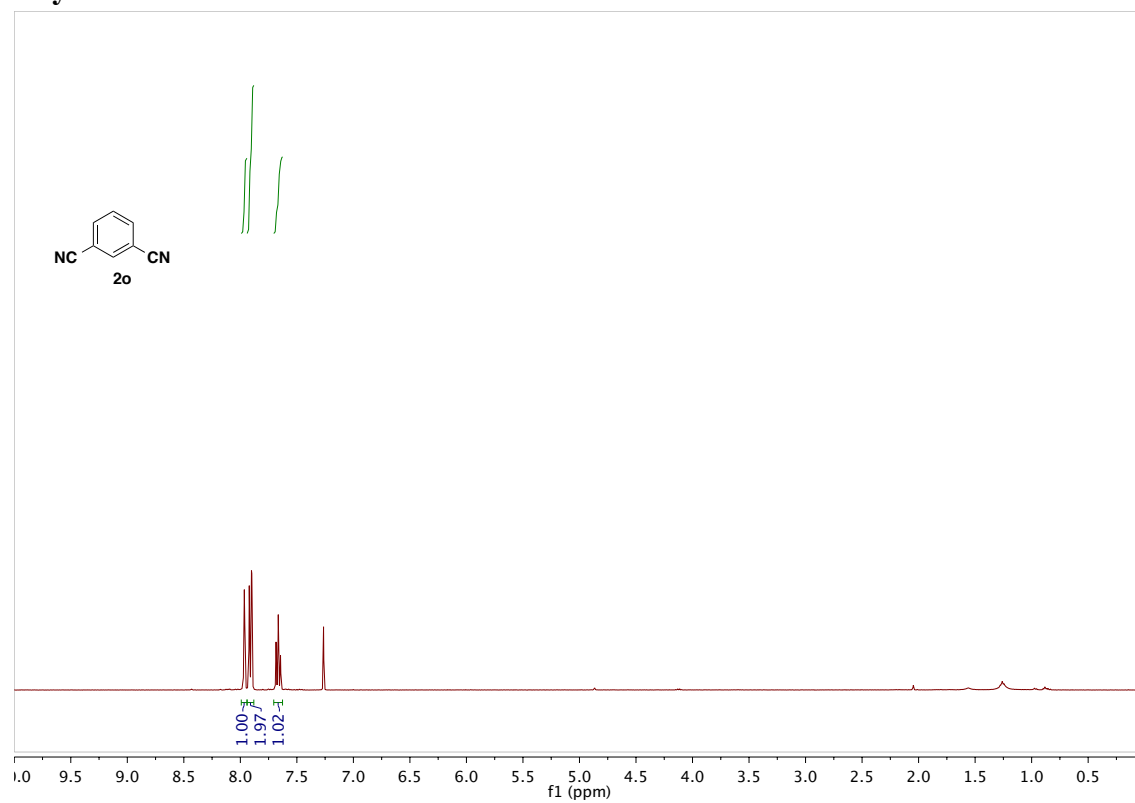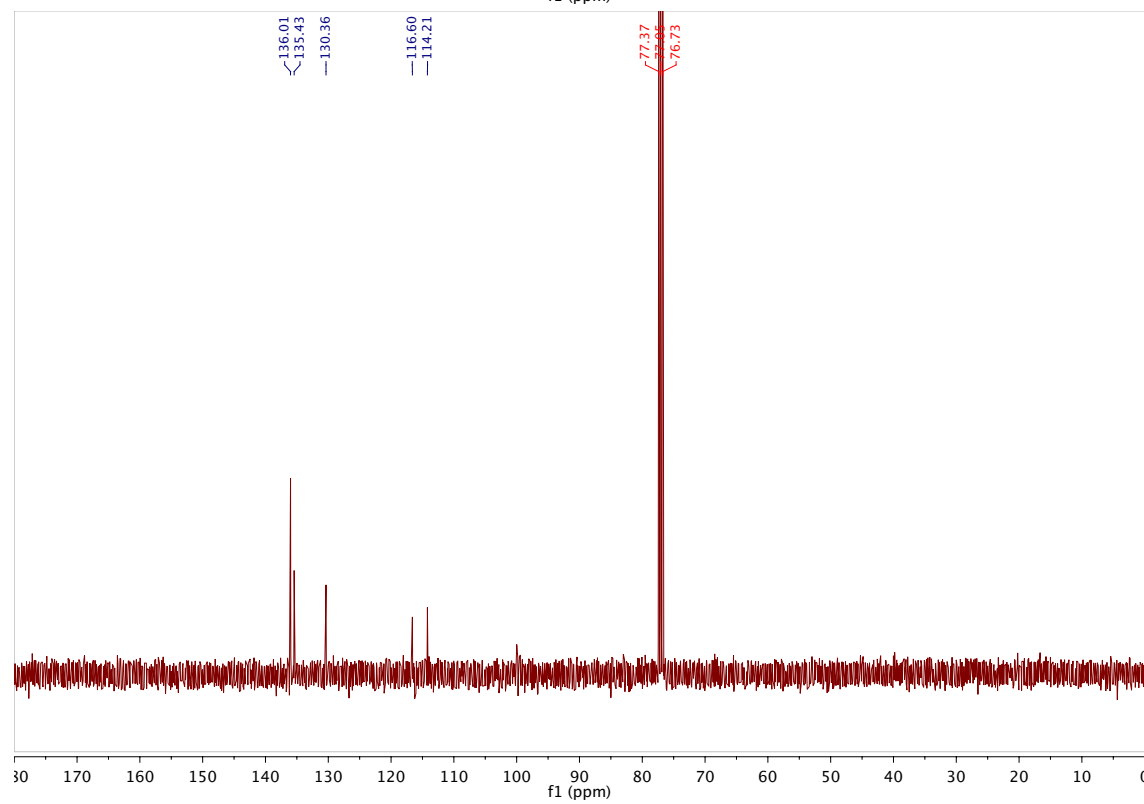

# Cinnamionitrile

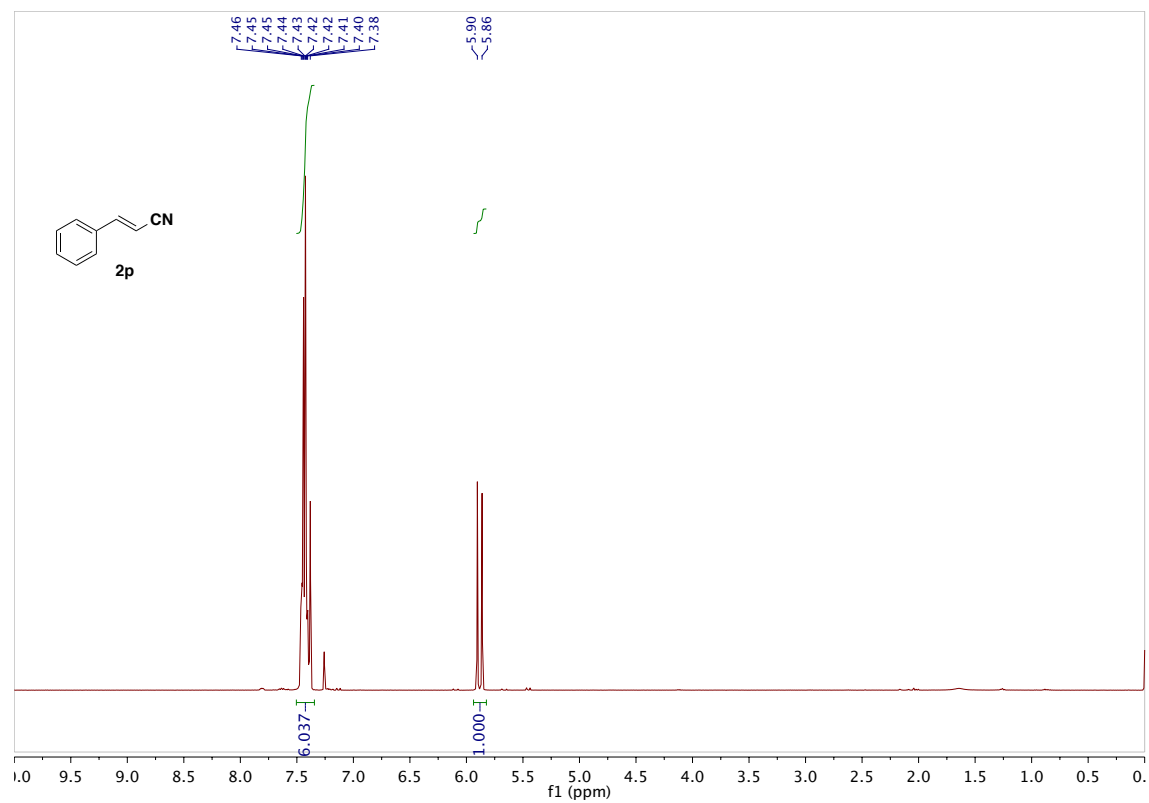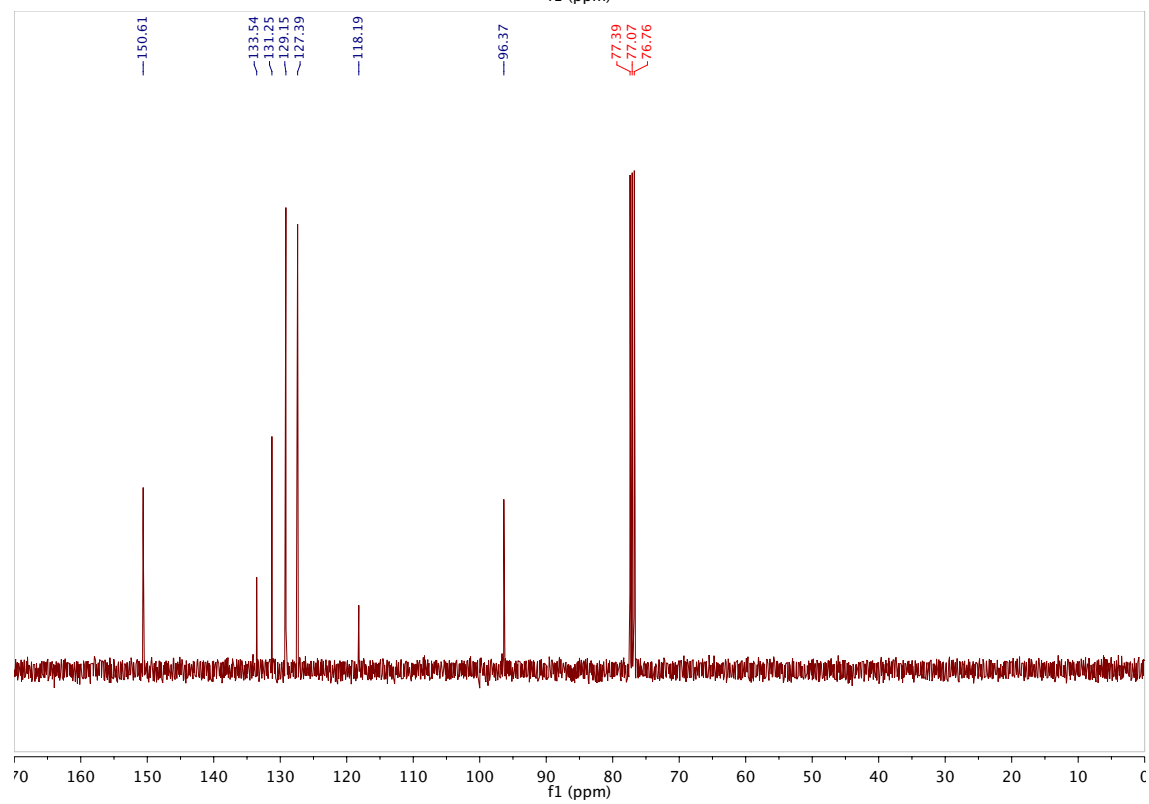

### 3,7-Dimethyl-2,6-octadienenitrile

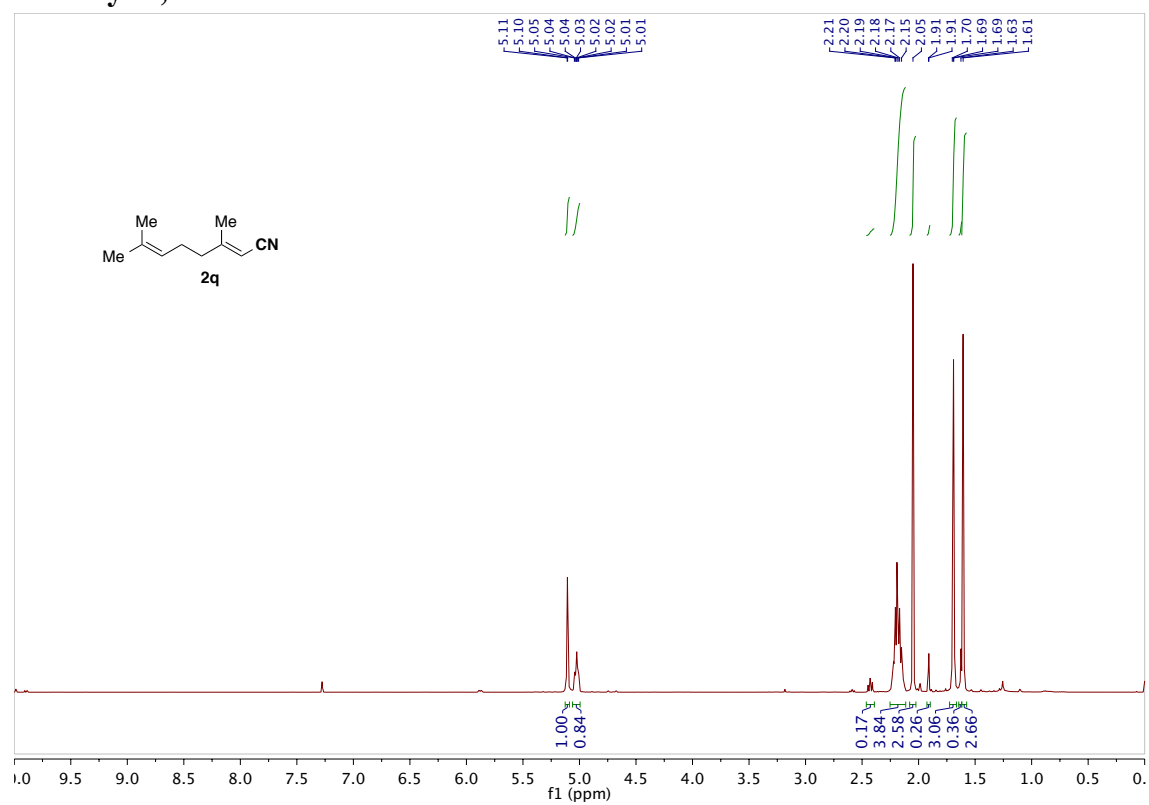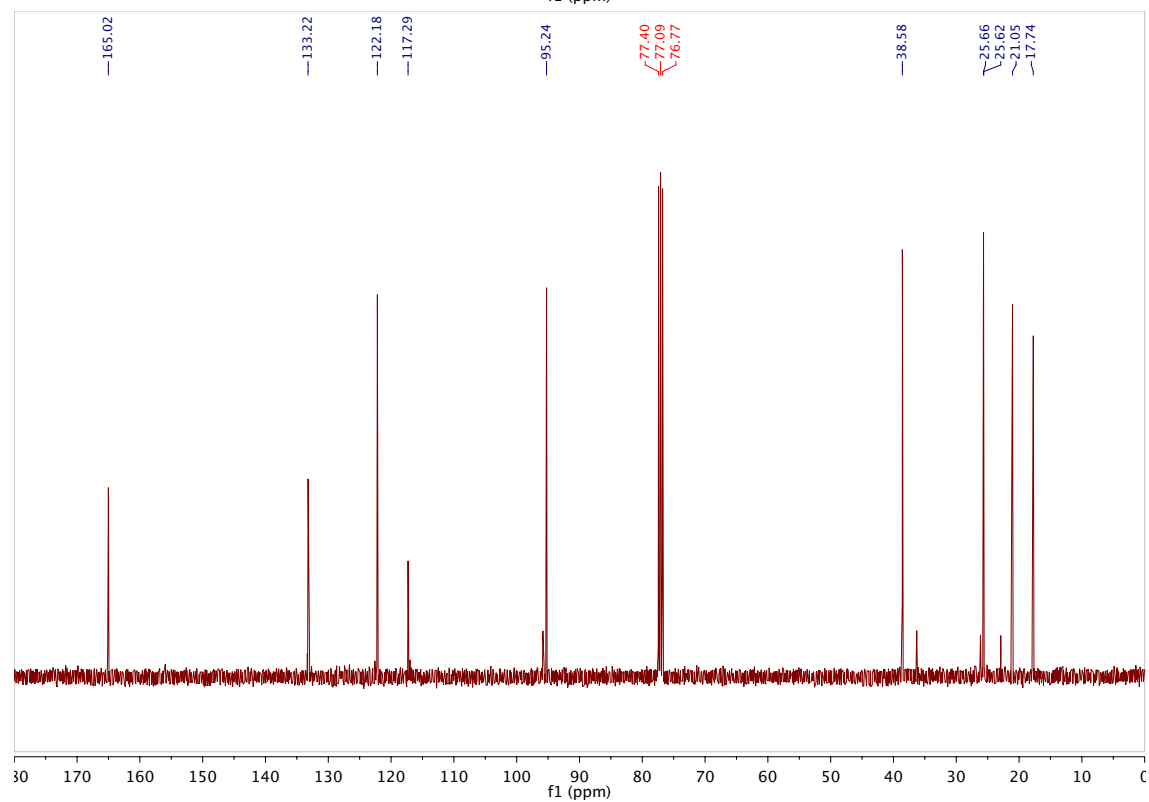



### 3-Phenylpropionitrile

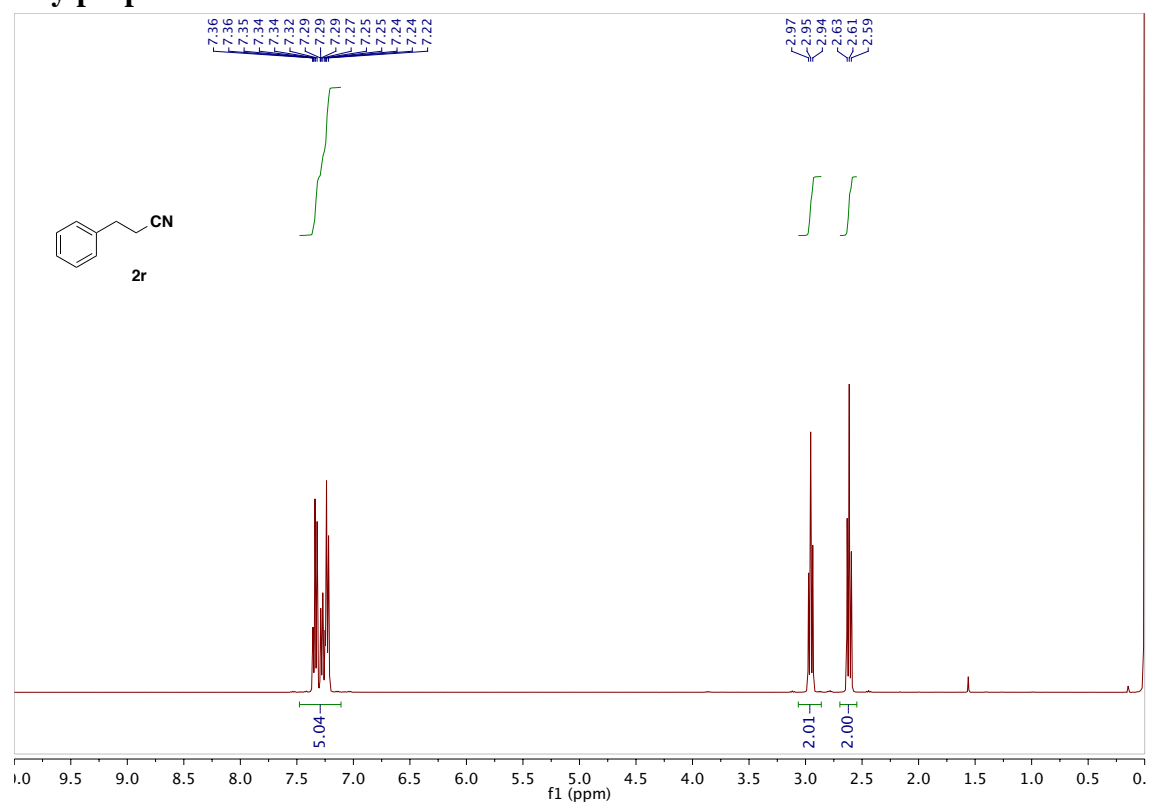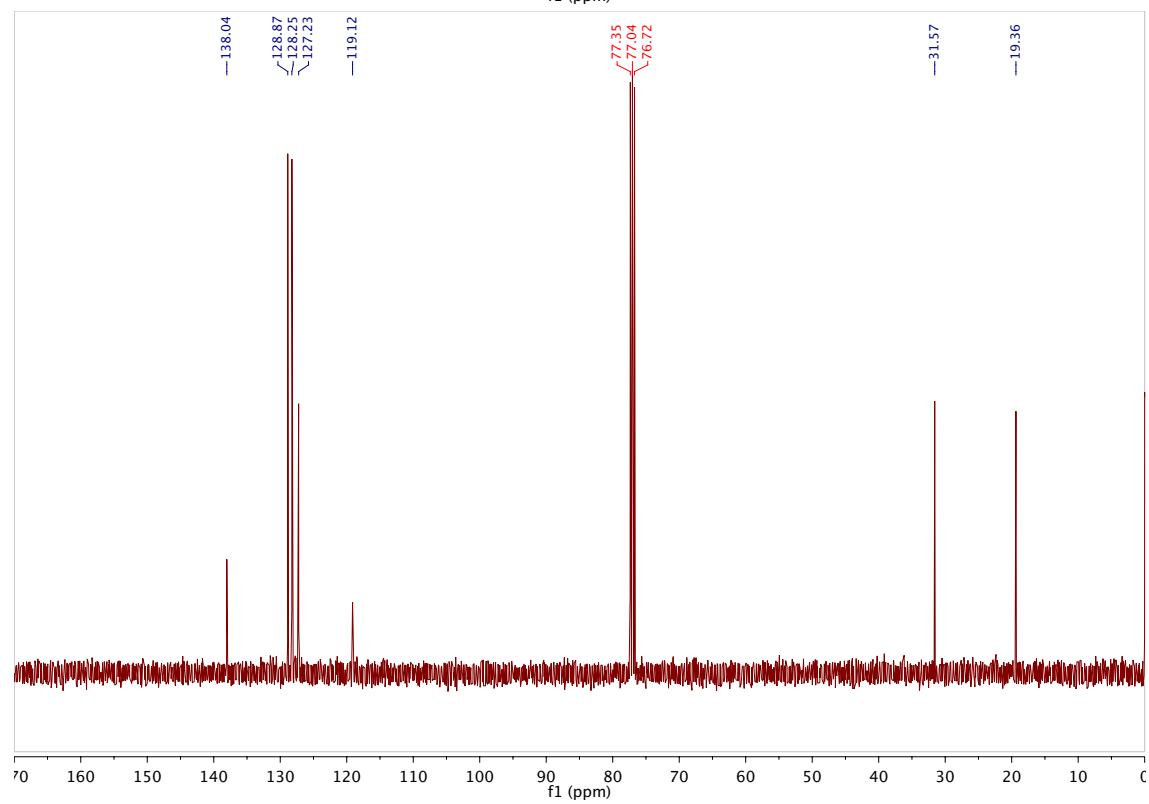

# Octanenitrile

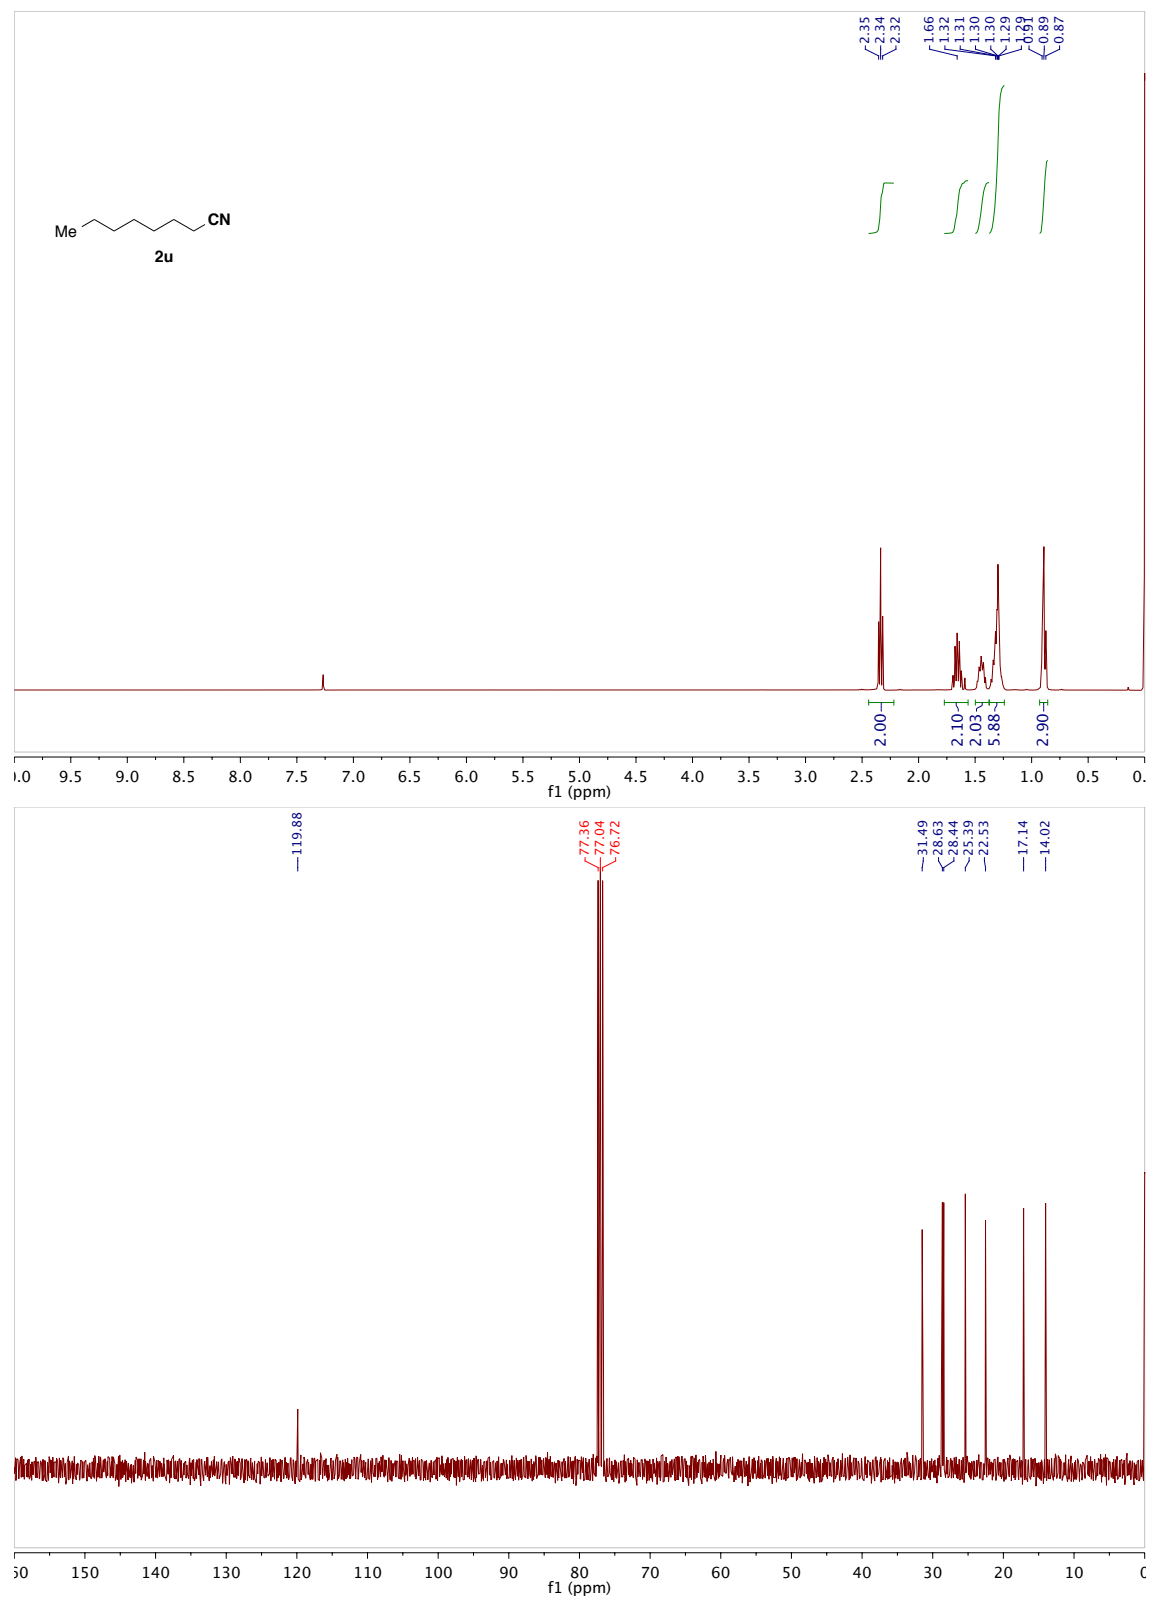

# Dodecanenitrile

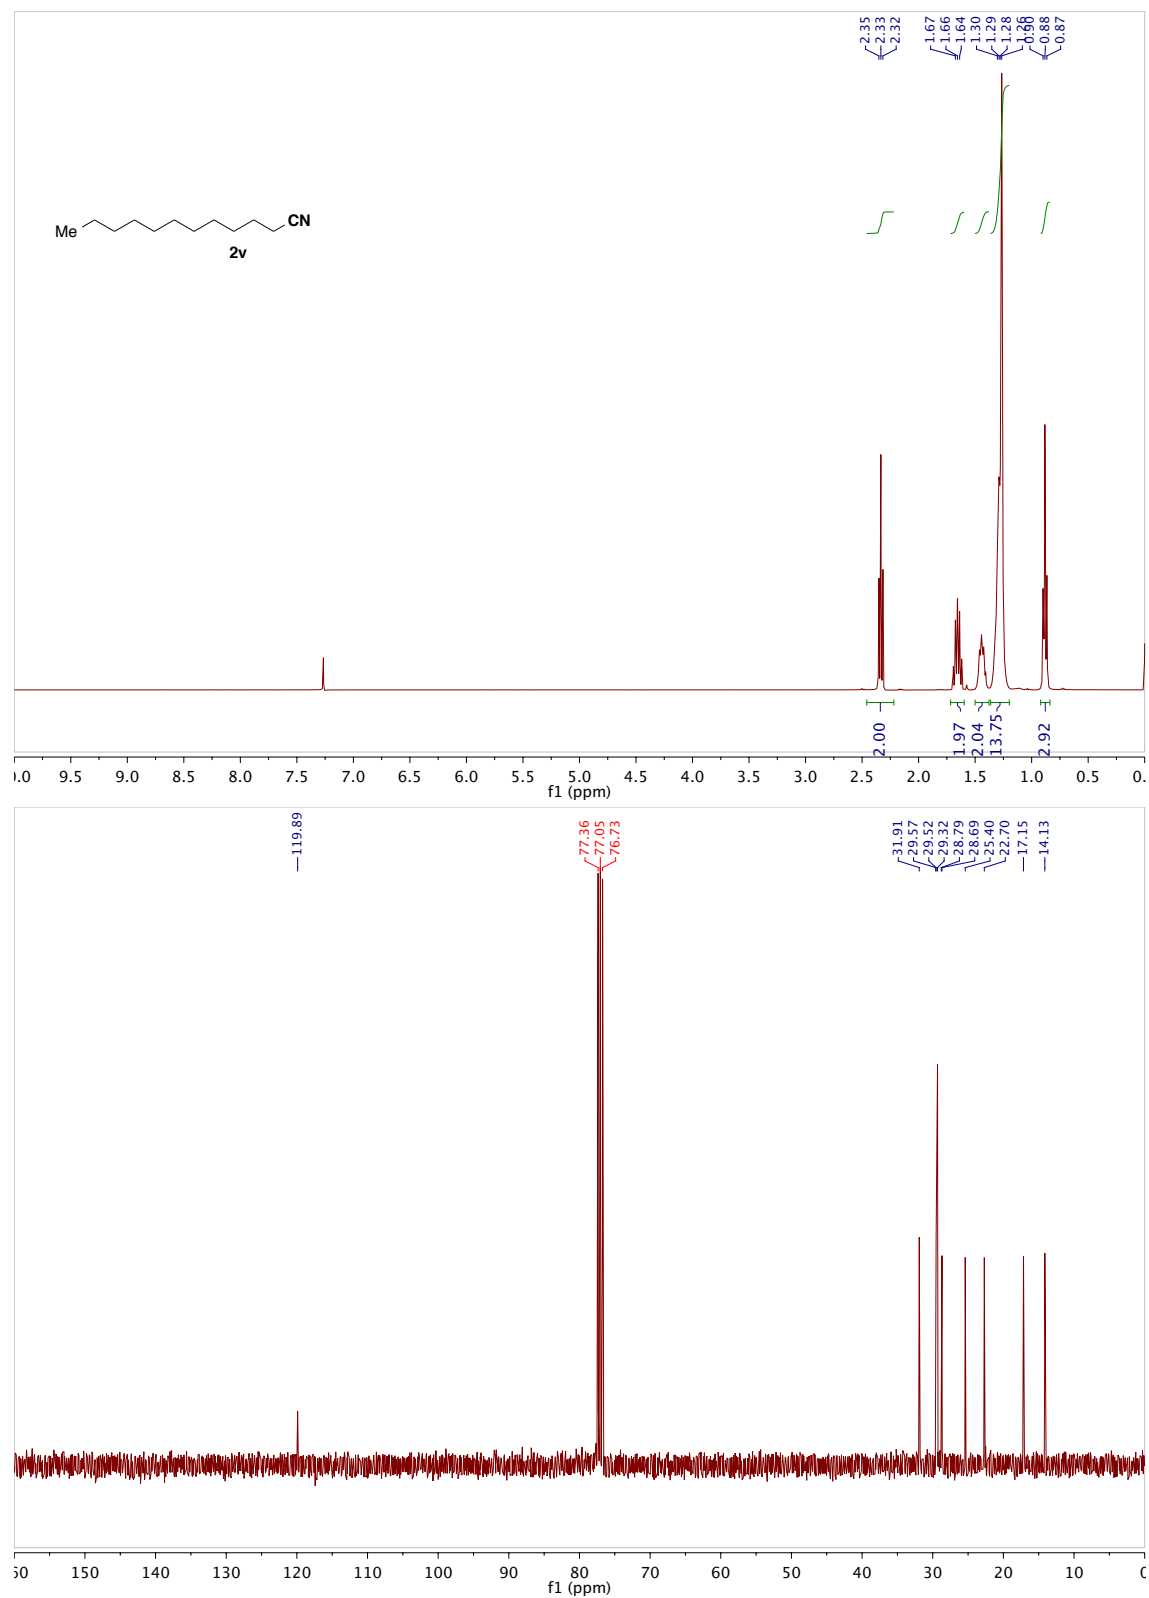

Supplement: NIHMS498414-supplement-1_si_001.pdf [file NIHMS498414-supplement-1_si_001.pdf]
